# 1 **REC8-cohesin, chromatin and transcription orchestrate** 2 **meiotic recombination in the Arabidopsis genome**

3  
4 Christophe Lambing<sup>1</sup>, Andrew J. Tock<sup>1</sup>, Kyuha Choi<sup>1</sup>, Stephanie D. Topp<sup>1</sup>, Pallas C.  
5 Kuo<sup>1</sup>, Alexander R. Blackwell<sup>1</sup>, Xiaohui Zhao<sup>1</sup>, Kim Osman<sup>2</sup>, James D. Higgins<sup>3</sup>, F.  
6 Chris H. Franklin<sup>2</sup> and Ian R. Henderson<sup>1\*</sup>

7  
8 <sup>1</sup> Department of Plant Sciences, University of Cambridge, Cambridge, CB2 3EA, United  
9 Kingdom

10 <sup>2</sup> School of Biosciences, University of Birmingham, Birmingham, B15 2TT, United  
11 Kingdom

12 <sup>3</sup> Department of Genetics and Genome Biology, University of Leicester, Leicester, LE1  
13 7RH, United Kingdom

14  
15 \*Correspondence: [irh25@cam.ac.uk](mailto:irh25@cam.ac.uk)

## 16 **Abstract:**

17  
18  
19 During meiosis chromosomes undergo DNA double-strand breaks (DSBs) that can be  
20 repaired using a homolog to produce crossovers, which creates genetic diversity.  
21 Meiotic recombination occurs coincident with homolog pairing and polymerization of  
22 the meiotic axis and synaptonemal complex (SC). REC8-cohesin is required to connect  
23 chromosomes to the axis and to organize axis polymerization. However, control of  
24 REC8 loading along chromosomes, in relation to chromatin, transcription and  
25 recombination, is not yet fully understood. Therefore, we performed REC8 ChIP-seq in  
26 Arabidopsis, which revealed strong enrichment in centromeric heterochromatin. REC8  
27 abundance correlates with suppression of meiotic DSBs and crossovers, despite axis  
28 loading of SPO11-1 in these regions. Loss of the heterochromatic marks H3K9me2  
29 and non-CG DNA methylation in *kyp/suvh4 suvh5 suvh6* mutants causes remodeling of  
30 REC8 and gain of meiotic recombination locally in repeated sequences, although  
31 centromere cohesion is maintained. In the chromosome arms, REC8 is enriched within  
32 gene bodies, exons and GC-rich sequences, and anti-correlates with transcription.  
33 Highest REC8 occupancy occurred in facultatively silent, H3K27me3-modified genes.  
34 Using immunocytology we show that axis polycomplexes form in *rec8* mutants that  
35 recruit recombination foci with altered stoichiometry, leading to catastrophic non-  
36 homologous recombination. Therefore, REC8 plays a key role organizing meiotic  
37 chromosome architecture and promoting high-fidelity interhomolog recombination.  
38 Despite this pro-recombination role, local REC8 enrichment associates with DSB  
39 repression at the fine scale, which is consistent with the tethered-loop/axis model.  
40 Coincident with its organizational role during meiosis, REC8-cohesin occupancy along  
41 the chromosomes is shaped by multiple chromatin states and transcription.

## 42 **Keywords:**

43  
44  
45 Cohesin, REC8, meiosis, recombination, crossover, H3K9me2, DNA methylation.  
46  
47  
48  
49  
50  
51  
52

53 **Introduction:**

54  
55 Cohesin complexes form ~35–50 nm rings that can topologically embrace one or more  
56 DNA helices (Uhlmann 2016; Nasmyth and Haering 2009; Peters et al. 2008). Cohesin  
57 rings consist of paired structural maintenance of chromosomes (SMC) proteins that  
58 interact at hinge and ATPase head domains, with the head regions clamped by an  $\alpha$ -  
59 kleisin (Gligoris and Löwe 2016). DNA can enter and exit cohesin rings at the subunit  
60 interfaces, and the rings undergo dynamic cycles of association and disassociation  
61 with chromosomes (Uhlmann 2016; Nasmyth and Haering 2009; Peters et al. 2008).  
62 Cohesin complexes regulate diverse nuclear processes, including chromosome  
63 condensation, segregation, gene expression and DNA replication, recombination and  
64 repair (Uhlmann 2016; Nasmyth and Haering 2009; Peters et al. 2008). Cohesin  
65 complexes containing the  $\alpha$ -kleisin REC8 also play critical roles in controlling meiotic  
66 chromosome segregation and interhomolog recombination.

67  
68 During meiosis eukaryotic genomes undergo DNA double-strand breaks (DSBs)  
69 generated by SPO11 topoisomerase-like complexes (Keeney et al. 1997; Baudat et al.  
70 2013). Meiotic DSBs can enter an interhomolog repair pathway to produce reciprocal  
71 crossovers, which creates genetic diversity (Hunter 2015). Following meiotic S-phase,  
72 sister chromatids form co-aligned chromatin loops connected to axial element polymers  
73 via REC8-cohesin complexes (Zickler and Kleckner 1999). The meiotic axis includes  
74 HORMA domain proteins (e.g. ASY1) (Armstrong et al. 2002), and interacting partners  
75 (e.g. ASY3) (Ferdous et al. 2012), which promote interhomolog recombination.  
76 Although REC8-cohesin plays essential roles in establishing the tethered-loop/axis  
77 architecture, its role in regulation of meiotic recombination is complex. For example,  
78 budding yeast cohesin and axis components are required to additively promote meiotic  
79 DSB repair (Klein et al. 1999; Kim et al. 2010), whereas local Rec8 enrichment  
80 suppresses DSB formation in both budding and fission yeast (Panizza et al. 2011;  
81 Storlazzi et al. 2008; Nambiar and Smith 2018). As meiosis proceeds, HORMA  
82 proteins become depleted, as synaptonemal complex (SC) components are installed  
83 (e.g. ZYP1), until synapsis completes at pachytene (Ferdous et al. 2012; Lambing et al.  
84 2015; Higgins et al. 2005). Hence, REC8-cohesin, axis and SC proteins play tightly  
85 integrated roles in establishing a chromosome structure that favors interhomolog repair  
86 during meiosis.

87  
88 SPO11 and its accessory factors dynamically associate with the axis in fungi and  
89 mammals during DSB formation, and DNA repair occurs at axis-associated sites  
90 (Stanzione et al. 2016; Blat et al. 2002; Panizza et al. 2011; Baudat et al. 2013;  
91 Nambiar and Smith 2018; Pan et al. 2011; Sommermeyer et al. 2013; Acquaviva et al.  
92 2013). Budding yeast DSB hotspots occur within nucleosome-free regions in the  
93 chromatin loops, in proximity to H3K4me3-modified nucleosomes at gene 5'-ends (Pan  
94 et al. 2011; Borde et al. 2009). Direct interactions occur between the Spp1 complex,  
95 which catalyzes and binds to H3K4me3, and the meiotic axis protein Mer2  
96 (Sommermeyer et al. 2013; Acquaviva et al. 2013). This supports a model where loop  
97 DNA sequences are tethered to the axis via specific chromatin modifications during  
98 DSB formation and repair. Interactions occur between functionally related components  
99 in mammals, including H3K4me3, CXXC1, IHO1 and PRDM9 (Parvanov et al. 2017;  
100 Imai et al. 2017), and plant crossovers are positively correlated with gene density and  
101 H3K4me3 (Choi et al. 2013). Therefore, euchromatic marks likely play conserved roles  
102 in recruiting loop DNA to the axis during meiotic recombination. Transcription itself  
103 plays an important role in shaping cohesin accumulation in gene-rich regions in mitosis  
104 and meiosis, and can therefore also influence recombination (Lengronne et al. 2004;  
105 Bausch et al. 2007; Sun et al. 2015; Busslinger et al. 2017).

106 In contrast to euchromatin, meiotic recombination is typically suppressed in  
107 heterochromatin (Underwood et al. 2018; Choi et al. 2018; Ellermeier et al. 2010).  
108 Heterochromatin is repeat and transposon-dense, late-replicating, suppressed for RNA  
109 polymerase II transcription and densely modified with epigenetic marks including DNA  
110 and H3K9 methylation (Janssen et al. 2018). Heterochromatic marks including DNA  
111 and H3K9 methylation are sufficient to silence meiotic recombination hotspot activity in  
112 plants, fungi and mammals (Zamudio et al. 2015; Yelina et al. 2015; Maloisel and  
113 Rossignol 1998). Cohesin is also strongly enriched in the centromeres and  
114 pericentromeric heterochromatin of animals and fungi (Tanaka et al. 1999; Mizuguchi  
115 et al. 2014; Sun et al. 2015; Blat et al. 2002; Klein et al. 1999; Bernard et al. 2001;  
116 Watanabe and Nurse 1999). In fission yeast, centromeric cohesin enrichment requires  
117 heterochromatin protein Swi6 and H3K9 methylation (Bernard et al. 2001; Nonaka et al.  
118 2002; Mizuguchi et al. 2014), implying a direct connection between heterochromatic  
119 epigenetic marks and cohesin recruitment. However, mouse centromeric cohesion is  
120 maintained during mitosis in *suv39h-1 suv39h-2* H3K9 methylation mutants, although  
121 local cohesin remodeling occurs on specific repeats (Koch et al. 2008; Guenatri et al.  
122 2004). Therefore, the functional relationships between cohesin, chromatin state and  
123 transcription during meiosis, and the consequences for interhomolog recombination,  
124 remain incompletely understood.

125  
126 Here we use a comprehensive array of genetic, genomic and immunocytological  
127 approaches to investigate the role of Arabidopsis REC8 in orchestrating meiotic  
128 chromosome architecture and recombination, and its functional interactions with  
129 chromatin and transcription. We show that *rec8* mutants undergo defective axis  
130 polycomplex formation, which associates with catastrophic non-homologous  
131 recombination. Using REC8 ChIP-seq we show strong enrichment in centromeric  
132 heterochromatin and within specific classes of RNA transposable elements. REC8  
133 levels anti-correlate with meiotic DSBs (SPO11-1-oligos) and crossovers at both the  
134 chromosome and fine scales. To directly test the role of heterochromatin on cohesin  
135 loading, we performed REC8 ChIP-seq in *kryptonite (kyp/suvh4) suvh5 suvh6* triple  
136 mutants, which lose H3K9me2 and non-CG DNA methylation. We observed  
137 remodelling of cohesin and DSB landscapes in repeated sequences in *kyp suvh5*  
138 *suvh6*, although centromere cohesion is maintained, meaning that Arabidopsis more  
139 closely resembles mice than fission yeast. Transcriptional changes in *kyp suvh5 suvh6*  
140 are associated with remodeling of REC8 occupancy and meiotic DSBs in both genes  
141 and transposable elements at the fine-scale. At the cytological scale, we show that  
142 *rec8* axis polycomplexes are able to recruit the recombination machinery, although with  
143 altered stoichiometry. The *rec8* polycomplexes undergo synapsis and ultimately cause  
144 non-homologous recombination. Hence, REC8-cohesin organizes meiotic chromosome  
145 architecture and high-fidelity homologous recombination, and is simultaneously  
146 influenced by both chromatin state and transcription.

147  
148  
149  
150  
151  
152  
153  
154  
155  
156  
157  
158

159 **Results:**

160

161 **Complementation of *rec8* meiotic catastrophe via epitope tagging**

162

163 To detect REC8 during meiosis we inserted 3×HA or 5×Myc epitopes into a genomic  
164 clone and transformed *rec8-3/+* heterozygotes. In wild type meiosis, chromatin matures  
165 from thin threads at leptotene, to thick paired axes at pachytene with condensed  
166 heterochromatin, until five bivalents connected via chiasmata are evident at metaphase  
167 I (Fig. 1A and Supplemental Fig. S1A). In contrast, no axis differentiation occurs in *rec8*  
168 chromatin, which is present as a diffuse mass during mid-prophase I although the  
169 proportion constituting heterochromatin is not significantly different (Mann-Whitney-  
170 Wilcoxon (MWW) test,  $P=0.55$ ) (Fig. 1A, Supplemental Fig. S1A–S1B and  
171 Supplemental Table S1). The entangled chromatin mass in *rec8* proceeds to fragment  
172 at metaphase I, causing complete sterility (Fig. 1A) (Cai et al. 2003; Chelysheva et al.  
173 2005). We observed that epitope-tagged *REC8* constructs complemented *rec8* meiotic  
174 phenotypes, including (i) axis formation during prophase I, (ii) the presence of five  
175 bivalents at metaphase I and (iii) chiasmata counts (Fig. 1A, Supplemental Fig. S2A  
176 and Supplemental Table S2).

177

178 To analyze REC8 accumulation on chromosomes we immunostained male meiocytes  
179 and observed co-localization with chromatin from leptotene onwards, including within  
180 heterochromatin (Fig. 1B and Supplemental Fig. S2B–S2C). REC8 and chromatin co-  
181 localize as pairing and synapsis occurs, with strong co-staining at pachytene (Fig. 1B  
182 and Supplemental Fig. S2B–S2C). REC8 persists on bivalents through diakinesis and  
183 metaphase I (Fig. 1B and Supplemental Fig. S2B), as reported (Chelysheva et al.  
184 2005; Cai et al. 2003). No signal was detected in non-transgenic wild type meiocytes,  
185 or somatic cells of the epitope-tagged lines (Fig. 1B and Supplemental Fig. S2B). We  
186 also performed western blotting on meiotic-stage flowers, which revealed bands of the  
187 expected size, in addition to bands with a ~20 kDa higher molecular mass  
188 (Supplemental Fig. S3). Similar heavy REC8 bands have been observed in yeast and  
189 mice and represent phosphorylated forms (Watanabe and Nurse 1999; Kitajima et al.  
190 2003).

191

192 **REC8 is the major Arabidopsis kleisin required for meiotic axis polymerization**  
193 **and prevention of non-homologous recombination**

194

195 Localization of cohesin and axis proteins are interdependent in many species (Kim et al.  
196 2010; Severson et al. 2009; Storlazzi et al. 2008; Chelysheva et al. 2005). Therefore,  
197 we used immunocytology with epifluorescence and super-resolution structured  
198 illumination microscopy (SIM) to analyze Arabidopsis axis proteins ASY1 and ASY3 in  
199 *rec8* (Fig. 1C–1D). In wild type, ASY1 and ASY3 co-localize along linear axes from  
200 leptotene until zygotene (Fig. 1D) (Ferdous et al. 2012). In *rec8*, ASY1 and ASY3 occur  
201 in polycomplexes that persist through mid-prophase I (Fig. 1C–1D). The length of *rec8*  
202 ASY1 polycomplexes was shorter compared to the wild type axis at leptotene  
203 (mean=30  $\mu\text{m}$  vs. 220  $\mu\text{m}$ , MWW test  $P=3.02\times 10^{-11}$ ) (Supplemental Table S3).  
204 Heterochromatic chromocenters were observed within and apart from ASY1  
205 polycomplexes in *rec8* (Supplemental Fig. S1C), suggesting they are independent  
206 structures. To analyze cohesin and the SC within the centromeres, we immunostained  
207 for SMC3 or ZYP1, in combination with fluorescence *in situ* hybridization (FISH) for the  
208 *CEN180* satellite repeats (Fig. 1E). At the zygotene–pachytene transition, we observed  
209 five *CEN180*-positive regions through which the SMC3 cohesin and ZYP1 SC signals  
210 were continuous and relatively uniform (Fig. 1E).

211

212 To investigate the *rec8* chromosome entanglements observed during prophase I, we  
213 performed FISH using 45S and 5S rDNA probes (Fig. 1F). This revealed physical  
214 connections between non-homologous chromosomes in *rec8*, not observed in wild type  
215 (Fig. 1F). Therefore, abnormal axis polymerization in *rec8* is associated with loss of  
216 recombination fidelity, leading to non-homologous joint molecules that resolve  
217 catastrophically at metaphase I (Fig. 1A and 1F). Although Arabidopsis encodes four  $\alpha$ -  
218 kleisins (*REC8/SYN1*, *SYN2*, *SYN3* and *SYN4*), *REC8* shows strongest transcription in  
219 meiotic RNA-seq data (Supplemental Fig. S4A) (Walker et al. 2018). Furthermore, we  
220 measured crossovers in *syn2* and *syn4* mutants using chiasmata counting and  
221 fluorescent tagged lines (FTL), and did not observe significant differences to wild type  
222 (Supplemental Fig. S4B–S4D and Supplemental Tables S4–S6).

## 223 224 **REC8 is enriched in centromeric heterochromatin**

225  
226 To map REC8 localization throughout the genome we performed ChIP-seq using  
227 *REC8-HA rec8* or *REC8-Myc rec8* floral buds (Fig. 2A–2B and Supplemental S5),  
228 which contain all stages of meiosis. ChIP and input DNA were sequenced and  
229  $\log_2(\text{ChIP}/\text{input})$  enrichment calculated (Supplemental Table S7). Z-score  
230 standardization was applied so that the genome-wide mean equals zero and a value of  
231 one equates to one standard deviation from the mean. Biological replicate libraries for  
232 REC8-HA ChIP-seq were highly correlated (10 kb  $r_s=0.99$ ), as were REC8-HA and  
233 REC8-Myc (10 kb  $r_s=0.81$ ), at varying physical scales (Supplemental Fig. S5 and  
234 Supplemental Table S8), so REC8-HA data were used for subsequent analyses.

235  
236 At the chromosome scale, REC8 enrichment was greatest in the centromeres and in  
237 proximal heterochromatin (Fig. 2A–2B). Consequently, we observed positive  
238 correlations between REC8 and transposable elements ( $r_s=0.79$ ), DNA methylation in  
239 CG ( $r_s=0.75$ ), CHG ( $r_s=0.72$ ) and CHH ( $r_s=0.75$ ) sequence contexts and the  
240 heterochromatic histone modifications H3K9me2 ( $r_s=0.86$ ), H3K27me1 ( $r_s=0.86$ ) and  
241 histone variant H2A.W ( $r_s=0.90$ ) (Fig. 2A, Supplemental Fig. S6 and Supplemental  
242 Table S9) (Stroud et al. 2013; Yelagandula et al. 2014). Nucleosomes, measured via  
243 MNase-seq, also show high pericentromeric enrichment and a positive correlation with  
244 REC8 ( $r_s=0.66$ ) (Fig. 2A). In contrast, genome-wide negative correlations between  
245 REC8 and gene density ( $r_s=-0.76$ ), and the gene-associated chromatin modifications  
246 H3K4me1 ( $r_s=-0.70$ ), H3K4me2 ( $r_s=-0.81$ ), H3K4me3 ( $r_s=-0.83$ ), H2A.Z ( $r_s=-0.75$ ) and  
247 H3K27me3 ( $r_s=-0.45$ ) were observed (Fig. 2B, Supplemental Fig. S6 and Supplemental  
248 Table S9) (Yelagandula et al. 2014). Hence, at the chromosome scale, REC8  
249 enrichment is strongly correlated with heterochromatin, although substantial signal  
250 occurs in the gene-rich chromosome arms. To validate ChIP specificity we analyzed  
251 REC8 peak loci using qPCR in *REC8-HA rec8* compared to untagged wild type, and  
252 observed significant enrichment in all cases (Fig. 2C and Supplemental Table S10).

253  
254 Hi-C studies have revealed A/B compartment organization in plant genomes, where the  
255 A compartment contains gene-rich euchromatin and the B compartment contains the  
256 centromeres and heterochromatin (Feng et al. 2014; Liu et al. 2016). We compared  
257 REC8 ChIP-seq data to a high resolution Hi-C map generated from Arabidopsis  
258 seedlings (Fig. 2D) (Liu et al. 2016). Hi-C Eigenvalues correspond to the first principle  
259 component of the contact matrix, where the sign of the value denotes the compartment  
260 (negative=A, positive=B) (Liu et al. 2016). Hi-C Eigenvalues showed a strong positive  
261 correlation with REC8 ( $r_s=0.70$ ) (Fig. 2D), indicating enrichment in the B compartment.  
262 We compared REC8 ChIP enrichment with cytogenetic maps made at pachytene that  
263 relate meiotic axis length ( $\mu\text{m}$ ) to physical DNA length (kb) (Fransz et al. 2000). For  
264 example, the chromosome 4 heterochromatic knob contains 614 kb/ $\mu\text{m}$ , compared to

265 euchromatic regions with a mean of 356 kb/ $\mu$ m (Supplemental Table S11) (Fransz et al.  
266 2000). Differential condensation of these regions is reflected by a 43-fold difference in  
267 REC8 ChIP-seq enrichment (Supplemental Table S11). Therefore, A/B compartment  
268 structure is likely a dominant feature of both mitotic and meiotic chromosomes in  
269 Arabidopsis, consistent with pronounced heterochromatin differentiation at pachytene  
270 (Fig. 1A–1B) (Fransz et al. 2000).

271

## 272 **REC8 anti-correlates with meiotic DSBs and crossovers**

273

274 We investigated the relationships between REC8, meiotic DSBs mapped using  
275 SPO11-1-oligos, and 3,320 crossovers mapped by genotyping-by-sequencing of  
276 Col $\times$ Ler F<sub>2</sub> individuals (Choi et al. 2018; Underwood et al. 2018). At the chromosome  
277 scale, SPO11-1-oligos and crossovers show negative correlations with REC8 ( $r_s$ =-0.22  
278 and  $r_s$ =-0.15), and these relationships are strengthened in the pericentromeres ( $r_s$ =-  
279 0.94 and  $r_s$ =-0.84) (Fig. 3A and Supplemental Fig. S6). However, variation in the ratio  
280 of SPO11-1-oligos, crossovers and REC8 was observed along the chromosomes (Fig.  
281 3A). Multiple factors likely contribute to this variation, including patterns of interhomolog  
282 polymorphism, chromatin states and the action of crossover interference.

283

284 We previously observed SPO11-1 immunostaining in association with ASY1  
285 throughout prophase I (Choi et al. 2018). To provide further insight into SPO11-1  
286 binding to the genome we performed ChIP-seq, using the SPO11-1-Myc line previously  
287 used for SPO11-1-oligo sequencing (Supplemental Table S9) (Choi et al. 2018). At the  
288 chromosome scale, SPO11-1 ChIP signal showed a positive correlation with REC8  
289 ( $r_s$ =0.64) and nucleosomes ( $r_s$ =0.87), and a negative correlation with SPO11-1-oligos  
290 ( $r_s$ =-0.69) and crossovers ( $r_s$ =-0.50) (Fig. 3A). Hence, while SPO11-1-oligos capture  
291 the DSB landscape, crosslinking of SPO11-1 to chromatin throughout meiosis reveals  
292 an axis-associated signal similar to REC8. These data are consistent with recruitment  
293 of chromatin loops to axis-associated SPO11-1 during DSB formation and repair (Blat  
294 et al. 2002; Panizza et al. 2011).

295

296 At the fine scale, Arabidopsis shows SPO11-1-oligo enrichment in nucleosome-  
297 depleted gene promoters and terminators (Fig. 3B) (Choi et al. 2018). In contrast,  
298 REC8 and SPO11-1 ChIP-seq show strongest enrichment within gene bodies towards  
299 transcriptional termination sites (TTSs), and were positively correlated with one another  
300 ( $r_s$ =0.98) (Fig. 3B). The REC8 profile within genes also strikingly correlates with  
301 transcript abundance and nucleosomes ( $r_s$ =0.95 and  $r_s$ =0.92) (Fig. 3B). We analyzed  
302 introns and exons, orientated in gene 5' to 3' directions, and observed that SPO11-1-  
303 oligos were relatively depleted from exons and enriched within introns, whereas REC8,  
304 SPO11-1 ChIP, transcripts and nucleosomes show the opposite trends (Supplemental  
305 Fig. S7). This reveals fine-scale variation in the meiotic axis and recombination  
306 machinery in relation to gene organization, transcription and chromatin.

307

308 To further analyze REC8 at the fine scale, we identified 87,738 peaks with a mean  
309 width of 475 bp (Fig. 3C, Supplemental Fig. S8A and Supplemental Table S12).  
310 Consistent with the trends at the chromosome scale and within genes, REC8 peak  
311 enrichment positively correlated with nucleosomes ( $r_s$ =0.68) and SPO11-1 ChIP  
312 ( $r_s$ =0.65), but negatively with SPO11-1-oligos ( $r_s$ =-0.72) (Fig. 3C). We applied  
313 permutation tests and observed that significantly fewer-than-expected REC8 peaks  
314 overlap SPO11-1-oligo hotspots and crossovers, and more-than-expected REC8 peaks  
315 overlap nucleosome positions and SPO11-1 ChIP peaks (all  $P$ <0.0001) (Supplemental  
316 Fig. S9 and Supplemental Table S12). We analyzed crossover intervals and 5 kb  
317 flanking regions and observed that REC8, nucleosomes and SPO11-1 ChIP were all

318 depleted, whereas SPO11-1-oligos were enriched (Fig. 3D and Supplemental Fig.  
319 S8B). Finally, we investigated DNA sequence composition and observed that REC8  
320 peaks and well-positioned nucleosomes show a strong GC bias, whereas SPO11-1-  
321 oligo hotspots and crossovers are AT-biased (Fig. 3E–3F). Therefore, REC8  
322 enrichment at both the chromosome and the fine scale is associated with suppression  
323 of SPO11-1-oligos and crossovers, and correlates with the presence of  
324 heterochromatin and GC-rich DNA sequences.

325

### 326 **REC8-cohesin and meiotic DSB landscapes are remodeled in *kyp suvh5 suvh6*** 327 **H3K9me2 mutants**

328

329 In plants, non-CG DNA methylation and H3K9me2 maintain each other in a self-  
330 reinforcing epigenetic loop (Stroud et al. 2014, 2013). For example, the  
331 *kryptonite/suvh4 suvh5 suvh6 (kss)* SET domain triple mutant eliminates both  
332 H3K9me2 and non-CG DNA methylation (Stroud et al. 2014, 2013). Mutants in the  
333 non-CG/H3K9me2 pathway also show increased pericentromeric DSBs and  
334 crossovers in Arabidopsis (Underwood et al. 2018). Therefore, we performed REC8-  
335 HA ChIP-seq in *kss* mutants to test for interactions between cohesin, chromatin and  
336 recombination. At the chromosome scale, the *kss* mutant shows slight but significant  
337 changes in REC8 ChIP enrichment, with decreases in the centromeric heterochromatin  
338 (one-tailed MWW test  $P=0.008$ ), and increases in the chromosome arms (one-tailed  
339 MWW test  $P=0.001$ ) (Supplemental Fig. S10). We performed REC8-HA  
340 immunostaining in wild type and *kss* and observed a slight decrease in signal over the  
341 heterochromatin, although this was not significant (Supplemental Tables S13–S14).  
342 Furthermore, the level of REC8 loading in *kss* is sufficient to maintain sister  
343 chromosome cohesion and no decrease in pollen viability occurs, compared to wild  
344 type (MWW test  $P=0.29$ ) (Fig. 4A and Supplemental Table S15). Hence, REC8  
345 function in maintaining cohesion during meiosis is not H3K9me2-dependent in  
346 Arabidopsis. To assess chromatin compaction during meiosis, pachytene cells were  
347 DAPI-stained and the proportion of area occupied by heterochromatin measured. A  
348 slight but significant decrease in heterochromatic compaction was observed in *kss*  
349 (MWW test  $P=0.047$ ) (Supplemental Table S16), which is consistent with changes to  
350 Hi-C contact maps in *kss* heterochromatin (Feng et al. 2014).

351

352 We next analyzed REC8, chromatin and recombination in wild type versus *kss* mutants  
353 at the fine scale. For example, 15,562 hypo-CHG differentially DNA methylated regions  
354 (DMRs) were previously identified in *kss* (Stroud et al. 2013), which in wild type are  
355 nucleosome-enriched and DSB-suppressed (Fig. 4B). We observed that these hypo-  
356 CHG DMRs lose both REC8 and H3K9me2, and gain SPO11-1-oligos in *kss* (one-  
357 tailed MWW tests, all  $P<2.2\times 10^{-16}$ ) (Fig. 4B). As a further test we analyzed H3K9me2  
358 peaks defined in wild type ( $n=20,289$ ), which showed a similar pattern to hypo-CHG  
359 DMRs, with coincident loss of H3K9me2, non-CG DNA methylation and REC8 and  
360 gain of SPO11-1-oligos in *kss* (all  $P<2.2\times 10^{-16}$ ) (Fig. 4C). We used ChIP-qPCR to  
361 analyze enrichment at REC8 peaks observed to lose both REC8 and H3K9me2 in *kss*  
362 (Fig. 4D and Supplemental Table S17). Using independent ChIP replicates this assay  
363 confirmed reduction of REC8 at the peak loci in *kss*, compared to a control locus that  
364 did not change (Fig. 4D and Supplemental Table S17).

365

366 We previously observed that DNA and RNA transposons are differentiated by  
367 chromatin state and levels of meiotic recombination in Arabidopsis (Choi et al. 2018).  
368 Compared to DNA elements, RNA elements show higher REC8 and nucleosomes, and  
369 lower SPO11-1-oligos (Fig. 4E–4G and Supplemental Fig. S11) (Choi et al. 2018).  
370 RNA elements also show higher H3K9me2 and non-CG methylation levels in wild type,

371 which are reduced in *kss* (Fig. 4E–4F). As observed at hypo-CHG DMRs, loss of  
372 heterochromatic marks at RNA elements correlates with reduced REC8 and gain of  
373 SPO11-1-oligos in *kss* (Fig. 4E–4F). In contrast, DNA elements also show loss of  
374 heterochromatic marks in *kss*, while REC8 was unchanged (Fig. 4E–4G). Hence,  
375 REC8, recombination and chromatin are differentiated across transposon classes, with  
376 greatest cohesin accumulation on heterochromatic RNA elements that are highly  
377 enriched in proximity to the centromeres.

378

### 379 **REC8 enrichment in genes anti-correlates with transcription levels**

380

381 Cohesin occupancy on chromosomes is strongly influenced by transcription  
382 (Busslinger et al. 2017; Lengronne et al. 2004; Misulovin et al. 2008; Kagey et al. 2010;  
383 Sun et al. 2015). Therefore, we compared REC8 enrichment with RNA-seq data  
384 generated from wild type meiotic-stage floral buds, or directly from male meiocytes (Fig.  
385 5A) (Walker et al. 2018; Choi et al. 2018). In both cases we observed an anti-  
386 correlation between RNA expression and REC8 enrichment at the chromosome scale  
387 ( $r_s=-0.80$  and  $r_s=-0.66$ ) (Fig. 5A). Within gene bodies, REC8 enrichment was spatially  
388 correlated with RNA expression ( $r_s=0.95$ ), H3K4me1 ( $r_s=0.87$ ) and CG DNA  
389 methylation ( $r_s=0.95$ ), whereas negative correlations were observed between REC8  
390 and chromatin modifications enriched at gene 5' ends, including H3K4me3 ( $r_s=-0.64$ ),  
391 H3K4me2 ( $r_s=-0.49$ ) and H2A.Z ( $r_s=-0.64$ ) (Fig. 5B). Therefore, REC8 accumulates  
392 within gene bodies, spatially coincident with chromatin marks associated with active  
393 transcription (H3K4me1 and CG methylation).

394

395 To further investigate the relationship between transcription levels and REC8, we  
396 ranked genes into six groups (hexiles), according to REC8 enrichment within  
397 transcribed regions (TSSs–TTSs) (Fig. 5C and Supplemental Fig. S12). Average REC8  
398 and transcription levels were negatively correlated ( $r_s=-0.44$ ), with highly transcribed  
399 genes showing lowest REC8 (Fig. 5C). Reciprocal patterns were observed when genes  
400 were ranked according to transcription, with low-expression genes showing highest  
401 REC8 (Supplemental Fig. S13). In addition, polarized REC8 enrichment occurs  
402 towards the TTS of gene hexiles with highest transcription (Fig. 5C), consistent with  
403 RNA polymerase pushing or evicting cohesin along transcribed genes. Gene hexiles  
404 with highest REC8 also show highest nucleosomes and H3K27me3 levels, lowest  
405 H3K4me3 and H2A.Z spreading throughout the gene body (Fig. 5C), which are  
406 features of facultatively silent genes in plants (Mozgova and Hennig 2015).  
407 Interestingly, analysis of H3K27me3 in relation to REC8 peaks showed enrichment in  
408 flanking positions, although the peaks themselves were depleted of this mark  
409 (Supplemental Fig. S8A). In conclusion, we observe intragenic REC8 enrichment, with  
410 highest levels in genes that are transcriptionally silenced by the Polycomb system and  
411 H3K27me3.

412

413 We performed RNA-seq from wild type and *kss* floral buds and compared these data to  
414 REC8, SPO11-1-oligo and DNA methylation data (Fig. 5D). Genes in wild type show  
415 low levels of CHG DNA methylation, which was further reduced in *kss* (Fig. 5D). We  
416 observed that gene promoters and terminators show increased REC8 and reduced  
417 SPO11-1-oligos in *kss*, whereas opposite trends are observed within gene bodies (Fig.  
418 5E). We performed differential expression analysis and identified 179 transposable  
419 elements (TEs) and 263 genes that were transcriptionally upregulated in *kss*  
420 (FDR<0.01) (Supplemental Fig. S14 and Supplemental Table S18). We observed  
421 reduced REC8 and gain of SPO11-1-oligos over the upregulated genes and TEs,  
422 coincident with loss of CHG DNA methylation (Fig. 5E–5F). These loci provide



423 examples of local changes to chromatin state and transcription that influence REC8  
424 occupancy and recombination, within both genes and transposons.

425  
426 **Axis polycomplexes in *rec8* recruit the homologous recombination machinery**  
427 **with altered stoichiometry**

428  
429 Our genomic data revealed that REC8 accumulates in regions of low meiotic DSBs and  
430 crossovers in Arabidopsis. We were therefore interested to further investigate the  
431 cause of meiotic chromosome fragmentation in *rec8*. As we observed evidence for  
432 non-homologous recombination in *rec8* using FISH (Fig. 1F), we hypothesized that  
433 *rec8* axis polycomplexes may recruit the recombination machinery. To visualize meiotic  
434 DSBs, we immunostained male meiocytes for  $\gamma$ H2A.X and observed a mean of 202  
435 axis foci in wild type (Fig. 6A and Supplemental Table S19). In *rec8*,  $\gamma$ H2A.X foci were  
436 significantly reduced (mean=53, MWW test  $P=3.37\times 10^{-6}$ ), although they remained  
437 associated with ASY1 polycomplexes (Fig. 6A and Table S19). We immunostained for  
438 the ssDNA binding proteins RPA1a, RAD51 and DMC1, which show mean axis-  
439 associated foci numbers of 181, 174 and 172 respectively at mid-prophase I in wild  
440 type, which were significantly reduced in *rec8* to 39, 36 and 14 (MWW tests,  
441  $P=3.37\times 10^{-6}$ ,  $P=3.33\times 10^{-6}$ ,  $P=1.08\times 10^{-5}$ ) (Fig. 6B–6C, Supplemental Fig. S15A and  
442 Supplemental Tables S19–S20). We also immunostained for SPO11-1-Myc and  
443 observed foci distributed throughout the nucleus that were axis-associated at leptotene  
444 and persisted until pachytene (Supplemental Fig. S15B and Supplemental Table S21).  
445 In *rec8*, SPO11-1-Myc signal was distributed throughout the nucleus, both within and  
446 apart from ASY1 polycomplexes (Supplemental Fig. S15B). The presence of SPO11-1  
447 in regions lacking axis polycomplexes in *rec8*, which also show an absence of DSB  
448 markers, is consistent with the axis being required to promote DSBs (Supplemental Fig.  
449 S15B). In support of this, a positive correlation exists between axis length and  $\gamma$ H2A.X  
450 and RAD51 foci between nuclei, in both wild type and *rec8* (wild type  $r_s=0.83$  and  $0.69$ ,  
451 *rec8*  $r_s=0.92$  and  $0.77$ ) (Supplemental Table S22). Together, this provides cytological  
452 evidence that DSB formation and interhomolog strand invasion are associated with  
453 *rec8* axis polycomplexes.

454  
455 We next immunostained for ZMM repair factors, which are required for formation of  
456 interfering crossovers (Hunter 2015). In wild type, the MutS homolog MSH4 forms a  
457 mean of 179 axis-associated foci at leptotene, which were significantly reduced in *rec8*  
458 (mean=13 foci, MWW test  $P=1.10\times 10^{-5}$ ) (Fig. 6D and Supplemental Table S20). The  
459 MutL homolog MLH1 acts late in prophase I and shows a mean of 10.4 chiasmata-  
460 associated foci at diakinesis, which were also significantly reduced in *rec8*, yet  
461 remained associated with the entangled chromosomes at late prophase I (mean=4.9  
462 foci, MWW test  $P=2.59\times 10^{-10}$ ) (Fig. 6E and Supplemental Table S23). It is notable that  
463 MSH4 and DMC1 foci showed a greater reduction in foci numbers (7.3% and 8.3% of  
464 wild type), compared with  $\gamma$ H2A.X, RAD51, RPA1a and MLH1 (26.2%, 19.9%, 22.4%  
465 and 47% of wild type) (Supplemental Fig. S15C and Supplemental Tables S19–S20  
466 and S23). Therefore, although *rec8* polycomplexes recruit recombination foci, they are  
467 reduced in number and show altered stoichiometry relative to wild type. We propose  
468 that a subset of these foci represent non-homologous recombination events in *rec8*  
469 that lead to joint molecules and fragmentation at metaphase I.

470  
471 We used immunocytology with epifluorescence and SIM to analyze Arabidopsis axis  
472 (ASY1, ASY3 and SMC3) and SC (ZYP1) components in wild type and *rec8* (Fig. 6F–  
473 6I). Chromosome synapsis initiates at zygotene with the formation of ZYP1 stretches,  
474 which become depleted of ASY1 (Fig. 6F), until full synapsis is achieved at pachytene  
475 (Ferdous et al. 2012). We observed short stretches of ZYP1 polymerization between

476 ASY1 polycomplexes in *rec8* (Fig. 6F). In wild type ZYP1 polymerizes between axes  
477 separated by a mean distance of 109 nm (Fig. 6G and Supplemental Table S24),  
478 consistent with eukaryotic SC widths (Zickler and Kleckner 1999). In *rec8*, ZYP1 was  
479 detected between ASY1 polycomplexes, with a mean distance not significantly different  
480 from wild type (119 nm, MWW test  $P=0.22$ ) (Fig. 6G and Supplemental Table S24).  
481 PCH2 is a conserved meiotic AAA+ATPase required to remodel the axis during  
482 synapsis, which forms a linear signal with ZYP1 at pachytene (Fig. 6H) (Lambing et al.  
483 2015). The *rec8* polycomplexes co-stained for both PCH2 and ZYP1 (Fig. 6H).  
484 Interestingly, the SMC3 cohesin subunit was recruited to ASY1 polycomplexes, despite  
485 the absence of REC8 (Fig. 6I). Therefore, *rec8* polycomplexes include ASY1, ASY3  
486 and SMC3 and can recruit PCH2 and ZYP1 to produce synapsed structures with a  
487 similar inter-axis width to wild type. These cytological data support a role for REC8-  
488 cohesin in organizing correct polymerization of the axis and SC and promoting high-  
489 fidelity interhomolog recombination.

490

#### 491 **Discussion:**

492

493 During meiosis, replicated sister chromatids are organized as linear loop arrays  
494 connected to the axis, where REC8 is enriched (Zickler and Kleckner 1999; Blat et al.  
495 2002; Panizza et al. 2011). Comparative analysis across eukaryotes supports a  
496 conserved density of ~20 chromatin loops per  $\mu\text{m}$  of axis at pachytene, with larger  
497 genomes having increased axis length and/or chromatin loop size (Zickler and  
498 Kleckner 1999). The 125 Mb Arabidopsis genome has an axis length of 331  $\mu\text{m}$   
499 equating to 378 kb/ $\mu\text{m}$  (Fransz et al. 2000). Assuming 20 loops per  $\mu\text{m}$ , this gives an  
500 estimate of 18.9 kb per loop (Fig. 7). Cytogenetic maps have also revealed that  
501 heterochromatin is more condensed (614 kb/ $\mu\text{m}$ ) than euchromatic regions (356  
502 kb/ $\mu\text{m}$ ) at pachytene (Fransz et al. 2000), equating to loop size estimates of 30.7 kb  
503 and 17.8 kb, respectively (Fig. 7). However, Arabidopsis meiotic chromosome spreads  
504 show that chromatin loops extend ~300 nm from the axis, which does not vary between  
505 euchromatin and heterochromatin (Ferdous et al. 2012; Armstrong et al. 2002).  
506 Therefore, to accommodate additional sequence per  $\mu\text{m}$  of axis, the heterochromatic  
507 loops must be more highly condensed (Fig. 7). This may enhance REC8 crosslinking to  
508 heterochromatin during ChIP, and is also reflected by interphase chromocenter  
509 organization and B-compartment identity (Liu et al. 2016; Feng et al. 2014; Fransz et al.  
510 2000). It is also important to note that REC8 is lost from the chromosome arms at ~30  
511 hours post S-phase, whereas it persists in the centromeres until ~33 hours (Cai et al.  
512 2003; Chelysheva et al. 2005). As we sample over all meiotic stages, this may further  
513 contribute to relative centromeric REC8 ChIP enrichment.

514

515 We tested the role of non-CG DNA methylation and H3K9me2 in REC8 loading using  
516 *kss* mutants (Stroud et al. 2013, 2014). We observed remodeling of REC8 occupancy  
517 in *kss*, with regions that lose H3K9me2 and non-CG DNA methylation showing cohesin  
518 depletion and gain of SPO11-1-oligos. This is consistent with cohesin and  
519 heterochromatin jointly suppressing meiotic DSBs, and is reflected by the shared  
520 preference of REC8 and nucleosomes for GC-rich sequences. In contrast, SPO11-1-  
521 oligo and crossover hotspots are AT-biased. Unlike in fission yeast *clr4* or *swi6*  
522 mutants, which lose heterochromatic H3K9me2 and centromere cohesion (Bernard et  
523 al. 2001; Nonaka et al. 2002; Mizuguchi et al. 2014; Ellermeier et al. 2010),  
524 Arabidopsis *kss* mutants retain sufficient centromeric REC8 to maintain sister cohesion.  
525 Hence, Arabidopsis more closely resembles mouse *suv39h1 suv39h2* H3K9me2  
526 mutants, where mitotic cohesin is recruited to heterochromatin, but with remodeling on  
527 major versus minor satellite repeats (Koch et al. 2008; Guenatri et al. 2004). We  
528 propose that in plant and mammalian genomes additional heterochromatic features act

529 redundantly with H3K9me2 to recruit and maintain cohesin in the centromeres.  
530 Interestingly, we observed SPO11-1 ChIP enrichment in the centromeres, coincident  
531 with elevated REC8 and nucleosome density. Hence, although SPO11-1 is axis-  
532 enriched in proximity to the heterochromatic loops, these sequences are not efficiently  
533 recruited to form DSBs or crossovers during meiosis (Fig. 7).

534  
535 Transcription drives cohesin occupancy in diverse eukaryotes (Lengronne et al. 2004;  
536 Bausch et al. 2007; Sun et al. 2015; Busslinger et al. 2017). Consistently, we observed  
537 a negative relationship between transcription level and REC8-cohesin occupancy  
538 within *Arabidopsis* genes. Hi-C contact maps in fission and budding yeast, which like  
539 plants lack CTCF, display contact associations at gene scale termed ‘globules’ and  
540 ‘crinkles’ that relate to transcription (Hsieh et al. 2015; Mizuguchi et al. 2014). High-  
541 resolution Hi-C studies in *Arabidopsis* have revealed contact associations over single  
542 genes, where 5’ and 3’ ends interact (Liu et al. 2016). The role of cohesin in intragenic  
543 contacts is unknown, although this may relate to the REC8 enrichment we observed  
544 within gene bodies. We identified transcriptionally upregulated genes and transposons  
545 in *kss*, which showed depletion of REC8 and gain of SPO11-1-oligos. This is consistent  
546 with an important role for transcription in shaping cohesin occupancy in plants. It is also  
547 important to consider that plant heterochromatin is actively transcribed by Pol IV and  
548 Pol V RNA polymerases, which produce short transcripts required for RNA-directed  
549 DNA methylation (Law and Jacobsen 2010). Hence, it will be interesting to explore the  
550 effects of heterochromatic transcription on cohesin occupancy in plant centromeric  
551 regions.

552  
553 Recombination suppression in proximity to the centromeres by cohesin and  
554 heterochromatin is important for fertility, as crossovers within these regions can cause  
555 aneuploidy (Lamb et al. 2005; Rockmill et al. 2006). Plant centromeres are flanked by  
556 large domains of transposon-dense pericentromeric heterochromatin (Law and  
557 Jacobsen 2010). As a consequence, plant chromosomes show pronounced telomere-  
558 centromere gradients of recombination, epigenetic modifications, cohesin enrichment,  
559 compartment identity and gene/transposon composition (Higgins et al. 2012; Feng et al.  
560 2014; Choi et al. 2018). These gradients likely exert a profound effect on sequence  
561 diversity along the length of plant chromosomes and contribute to their functional  
562 stratification and evolution. Indeed, genetic variation in *REC8* and meiotic axis genes  
563 has been identified as targets of selection during polyploid evolution in *Arabidopsis*  
564 *arenosa* (Yant et al. 2013; Wright et al. 2015). This effect is likely via modification of  
565 crossover patterns and stabilization of polyploid chromosome inheritance (Yant et al.  
566 2013; Wright et al. 2015). Hence, far from being static components of plant genome  
567 architecture, REC8-cohesin and the meiotic axis dynamically evolve and influence  
568 patterns of recombination and diversity.

569  
570 **Acknowledgements:**

571  
572 We thank Mathilde Grelon for the MLH1 antibody, Paul Fransz for discussions  
573 concerning cytological data, Chang Liu for providing Hi-C data and the Gurdon Institute  
574 for access to microscopes. Research was supported by grants from the ERC  
575 (SynthHotSpot) and BBSRC (BB/L006847/1 and BB/N007557/1), an EMBO long term  
576 postdoctoral fellowship (ALTF 807-2009) and a Gatsby Foundation Sainsbury  
577 studentship GAT3401. The authors declare no competing interests.

578  
579  
580  
581

582 **Author Contributions:**

583

584 Conceptualization: CL, AJT, KC, JH, FCHF, IRH. Software: AJT, XZ, IRH.  
585 Investigation: CL, KC, SDT, PCK, ARB, JH. Writing: CL, AJT, KC, ARB, KO, JH, FCHF,  
586 IRH.

587

588 **References:**

589

590 Acquaviva L, Székvölgyi L, Dichtl B, Dichtl BS, de La Roche Saint André C, Nicolas A,  
591 Géli V. 2013. The COMPASS subunit Spp1 links histone methylation to initiation  
592 of meiotic recombination. *Science* **339**: 215–8.

593 Armstrong SJ, Caryl AP, Jones GH, Franklin FCH. 2002. Asy1, a protein required for  
594 meiotic chromosome synapsis, localizes to axis-associated chromatin in  
595 Arabidopsis and Brassica. *J Cell Sci* **115**: 3645–55.

596 Baudat F, Imai Y, de Massy B. 2013. Meiotic recombination in mammals: localization  
597 and regulation. *Nat Rev Genet* **14**: 794–806.

598 Bausch C, Noone S, Henry JM, Gaudenz K, Sanderson B, Seidel C, Gerton JL. 2007.  
599 Transcription alters chromosomal locations of cohesin in *Saccharomyces*  
600 *cerevisiae*. *Mol Cell Biol* **27**: 8522–32.

601 Bernard P, Maure JF, Partridge JF, Genier S, Javerzat JP, Allshire RC. 2001.  
602 Requirement of Heterochromatin for Cohesion at Centromeres. *Science* (80- )  
603 **294**: 2539–2542.

604 Blat Y, Protacio RU, Hunter N, Kleckner N. 2002. Physical and functional interactions  
605 among basic chromosome organizational features govern early steps of meiotic  
606 chiasma formation. *Cell* **111**: 791–802.

607 Borde V, Robine N, Lin W, Bonfils S, Géli V, Nicolas A. 2009. Histone H3 lysine 4  
608 trimethylation marks meiotic recombination initiation sites. *EMBO J* **28**: 99–111.

609 Buslinger GA, Stocsits RR, van der Lelij P, Axelsson E, Tedeschi A, Galjart N, Peters  
610 J-M. 2017. Cohesin is positioned in mammalian genomes by transcription, CTCF  
611 and Wapl. *Nature* **544**: 503–507.

612 Cai X, Dong F, Edelmann RE, Makaroff CA. 2003. The Arabidopsis SYN1 cohesin  
613 protein is required for sister chromatid arm cohesion and homologous  
614 chromosome pairing. *J Cell Sci* **116**: 2999–3007.

615 Chelysheva L, Diallo S, Vezon D, Gendrot G, Vrielynck N, Belcram K, Rocques N,  
616 Márquez-Lema A, Bhatt AM, Horlow C, et al. 2005. AtREC8 and AtSCC3 are  
617 essential to the monopolar orientation of the kinetochores during meiosis. *J Cell*  
618 *Sci* **118**: 4621–32.

619 Choi K, Zhao X, Kelly KA, Venn O, Higgins JD, Yelina NE, Hardcastle TJ, Ziolkowski  
620 PA, Copenhaver GP, Franklin FCH, et al. 2013. Arabidopsis meiotic crossover hot  
621 spots overlap with H2A.Z nucleosomes at gene promoters. *Nat Genet* **45**: 1327–  
622 36.

623 Choi K, Zhao X, Tock AJ, Lambing C, Underwood CJ, Hardcastle TJ, Serra H, Kim J,  
624 Cho HS, Kim J, et al. 2018. Nucleosomes and DNA methylation shape meiotic  
625 DSB frequency in Arabidopsis thaliana transposons and gene regulatory regions.  
626 *Genome Res* doi: 10.1101/gr.225599.117.

627 Ellermeier C, Higuchi EC, Phadnis N, Holm L, Geelhood JL, Thon G, Smith GR. 2010.  
628 RNAi and heterochromatin repress centromeric meiotic recombination. *Proc Natl*  
629 *Acad Sci U S A* **107**: 8701–5.

630 Feng S, Cokus SJ, Schubert V, Zhai J, Pellegrini M, Jacobsen SE. 2014. Genome-  
631 wide Hi-C analyses in wild-type and mutants reveal high-resolution chromatin  
632 interactions in Arabidopsis. *Mol Cell* **55**: 694–707.

633 Ferdous M, Higgins JD, Osman K, Lambing C, Roitinger E, Mechtler K, Armstrong SJ,  
634 Perry R, Pradillo M, Cuñado N, et al. 2012. Inter-homolog crossing-over and

- 635       synapsis in Arabidopsis meiosis are dependent on the chromosome axis protein  
636       AtASY3. *PLoS Genet* **8**: e1002507.
- 637       Fransz PF, Armstrong S, de Jong JH, Parnell LD, van Druenen C, Dean C, Zabel P,  
638       Bisseling T, Jones GH. 2000. Integrated cytogenetic map of chromosome arm 4S  
639       of *A. thaliana*: structural organization of heterochromatic knob and centromere  
640       region. *Cell* **100**: 367–76.
- 641       Gligoris T, Löwe J. 2016. Structural Insights into Ring Formation of Cohesin and  
642       Related Smc Complexes. *Trends Cell Biol* **26**: 680–693.
- 643       Guenatri M, Bailly D, Maison C, Almouzni G. 2004. Mouse centric and pericentric  
644       satellite repeats form distinct functional heterochromatin. *J Cell Biol* **166**: 493–505.
- 645       Higgins JD, Perry RM, Barakate A, Ramsay L, Waugh R, Halpin C, Armstrong SJ,  
646       Franklin FCH. 2012. Spatiotemporal asymmetry of the meiotic program underlies  
647       the predominantly distal distribution of meiotic crossovers in barley. *Plant Cell* **24**:  
648       4096–109.
- 649       Higgins JD, Sanchez-Moran E, Armstrong SJ, Jones GH, Franklin FCH. 2005. The  
650       Arabidopsis synaptonemal complex protein ZYP1 is required for chromosome  
651       synapsis and normal fidelity of crossing over. *Genes Dev* **19**: 2488–2500.
- 652       Hsieh T-HS, Weiner A, Lajoie B, Dekker J, Friedman N, Rando OJ. 2015. Mapping  
653       Nucleosome Resolution Chromosome Folding in Yeast by Micro-C. *Cell* **162**: 108–  
654       19.
- 655       Hunter N. 2015. Meiotic Recombination: The Essence of Heredity. *Cold Spring Harb*  
656       *Perspect Biol* **7**: a016618.
- 657       Imai Y, Baudat F, Taillepierre M, Stanzione M, Toth A, de Massy B. 2017. The PRDM9  
658       KRAB domain is required for meiosis and involved in protein interactions.  
659       *Chromosoma* 681–695.
- 660       Janssen A, Colmenares SU, Karpen GH. 2018. Heterochromatin: Guardian of the  
661       Genome. *Annu Rev Cell Dev Biol* **34**: 265–288.
- 662       Kagey MH, Newman JJ, Bilodeau S, Zhan Y, Orlando DA, van Berkum NL, Ebmeier  
663       CC, Goossens J, Rahl PB, Levine SS, et al. 2010. Mediator and cohesin connect  
664       gene expression and chromatin architecture. *Nature* **467**: 430–435.
- 665       Keeney S, Giroux CN, Kleckner N. 1997. Meiosis-specific DNA double-strand breaks  
666       are catalyzed by Spo11, a member of a widely conserved protein family. *Cell* **88**:  
667       375–84.
- 668       Kim KP, Weiner BM, Zhang L, Jordan A, Dekker J, Kleckner N. 2010. Sister cohesion  
669       and structural axis components mediate homolog bias of meiotic recombination.  
670       *Cell* **143**: 924–37.
- 671       Kitajima TS, Miyazaki Y, Yamamoto M, Watanabe Y. 2003. Rec8 cleavage by  
672       separase is required for meiotic nuclear divisions in fission yeast. *EMBO J* **22**:  
673       5643–53.
- 674       Klein F, Mahr P, Galova M, Buonomo SB, Michaelis C, Nairz K, Nasmyth K. 1999. A  
675       central role for cohesins in sister chromatid cohesion, formation of axial elements,  
676       and recombination during yeast meiosis. *Cell* **98**: 91–103.
- 677       Koch B, Kueng S, Ruckenbauer C, Wendt KS, Peters J-M. 2008. The Suv39h–HP1  
678       histone methylation pathway is dispensable for enrichment and protection of  
679       cohesin at centromeres in mammalian cells. *Chromosoma* **117**: 199–210.
- 680       Lamb NE, Sherman SL, Hassold TJ. 2005. Effect of meiotic recombination on the  
681       production of aneuploid gametes in humans. *Cytogenet Genome Res* **111**: 250–5.
- 682       Lambing C, Osman K, Nuntasontorn K, West A, Higgins JD, Copenhaver GP, Yang J,  
683       Armstrong SJ, Mechtler K, Roitinger E, et al. 2015. Arabidopsis PCH2 Mediates  
684       Meiotic Chromosome Remodeling and Maturation of Crossovers. *PLoS Genet* **11**:  
685       e1005372.
- 686       Law JA, Jacobsen SE. 2010. Establishing, maintaining and modifying DNA methylation  
687       patterns in plants and animals. *Nat Rev Genet* **11**: 204–220.

- 688 Lengronne A, Katou Y, Mori S, Yokobayashi S, Kelly GP, Itoh T, Watanabe Y,  
689 Shirahige K, Uhlmann F. 2004. Cohesin relocation from sites of chromosomal  
690 loading to places of convergent transcription. *Nature* **430**: 573–578.
- 691 Liu C, Wang C, Wang G, Becker C, Zaidem M, Weigel D. 2016. Genome-wide analysis  
692 of chromatin packing in *Arabidopsis thaliana* at single-gene resolution. *Genome*  
693 *Res* **26**: 1057–1068.
- 694 Maloisel L, Rossignol JL. 1998. Suppression of crossing-over by DNA methylation in  
695 *Ascobolus*. *Genes Dev* **12**: 1381–9.
- 696 Misulovin Z, Schwartz YB, Li X-Y, Kahn TG, Gause M, MacArthur S, Fay JC, Eisen MB,  
697 Pirrotta V, Biggin MD, et al. 2008. Association of cohesin and Nipped-B with  
698 transcriptionally active regions of the *Drosophila melanogaster* genome.  
699 *Chromosoma* **117**: 89–102.
- 700 Mizuguchi T, Fudenberg G, Mehta S, Belton J-M, Taneja N, Folco HD, FitzGerald P,  
701 Dekker J, Mirny L, Barrowman J, et al. 2014. Cohesin-dependent globules and  
702 heterochromatin shape 3D genome architecture in *S. pombe*. *Nature* **516**: 432–  
703 435.
- 704 Mozgova I, Hennig L. 2015. The Polycomb Group Protein Regulatory Network. *Annu*  
705 *Rev Plant Biol* **66**: 269–296.
- 706 Nambiar M, Smith GR. 2018. Pericentromere-Specific Cohesin Complex Prevents  
707 Meiotic Pericentric DNA Double-Strand Breaks and Lethal Crossovers. *Mol Cell*.
- 708 Nasmyth K, Haering CH. 2009. Cohesin: Its Roles and Mechanisms. *Annu Rev Genet*  
709 **43**: 525–558.
- 710 Nonaka N, Kitajima T, Yokobayashi S, Xiao G, Yamamoto M, Grewal SIS, Watanabe Y.  
711 2002. Recruitment of cohesin to heterochromatic regions by Swi6/HP1 in fission  
712 yeast. *Nat Cell Biol* **4**: 89–93.
- 713 Pan J, Sasaki M, Kniewel R, Murakami H, Blitzblau HG, Tischfield SE, Zhu X, Neale  
714 MJ, Jasin M, Socci ND, et al. 2011. A hierarchical combination of factors shapes  
715 the genome-wide topography of yeast meiotic recombination initiation. *Cell* **144**:  
716 719–31.
- 717 Panizza S, Mendoza MA, Berlinger M, Huang L, Nicolas A, Shirahige K, Klein F. 2011.  
718 Spo11-accessory proteins link double-strand break sites to the chromosome axis  
719 in early meiotic recombination. *Cell* **146**: 372–83.
- 720 Parvanov ED, Tian H, Billings T, Saxl RL, Spruce C, Aithal R, Krejci L, Paigen K,  
721 Petkov PM. 2017. PRDM9 interactions with other proteins provide a link between  
722 recombination hotspots and the chromosomal axis in meiosis ed. Y.M. Yamashita.  
723 *Mol Biol Cell* **28**: 488–499.
- 724 Peters J-M, Tedeschi A, Schmitz J. 2008. The cohesin complex and its roles in  
725 chromosome biology. *Genes Dev* **22**: 3089–3114.
- 726 Rockmill B, Voelkel-Meiman K, Roeder GS. 2006. Centromere-proximal crossovers are  
727 associated with precocious separation of sister chromatids during meiosis in  
728 *Saccharomyces cerevisiae*. *Genetics* **174**: 1745–1754.
- 729 Severson AF, Ling L, Van Zuylen V, Meyer BJ. 2009. The axial element protein HTP-3  
730 promotes cohesin loading and meiotic axis assembly in *C. elegans* to implement  
731 the meiotic program of chromosome segregation. *Genes Dev* **23**: 1763–1778.
- 732 Sommermeyer V, Béneut C, Chaplais E, Serrentino ME, Borde V. 2013. Spp1, a  
733 member of the Set1 Complex, promotes meiotic DSB formation in promoters by  
734 tethering histone H3K4 methylation sites to chromosome axes. *Mol Cell* **49**: 43–54.
- 735 Stanzone M, Baumann M, Papanikos F, Dereli I, Lange J, Ramlal A, Tränkner D,  
736 Shibuya H, de Massy B, Watanabe Y, et al. 2016. Meiotic DNA break formation  
737 requires the unsynapsed chromosome axis-binding protein IHO1 (CCDC36)  
738 in mice. *Nat Cell Biol* **18**: 1208–1220.
- 739 Storlazzi A, Tesse S, Ruprich-Robert G, Gargano S, Poggeler S, Kleckner N, Zickler D.  
740 2008. Coupling meiotic chromosome axis integrity to recombination. *Genes Dev*

- 741           **22**: 796–809.
- 742       Stroud H, Do T, Du J, Zhong X, Feng S, Johnson L, Patel DJ, Jacobsen SE. 2014.
- 743       Non-CG methylation patterns shape the epigenetic landscape in Arabidopsis. *Nat*
- 744       *Struct Mol Biol* **21**: 64–72.
- 745       Stroud H, Greenberg MVC, Feng S, Bernatavichute Y V, Jacobsen SE. 2013.
- 746       Comprehensive analysis of silencing mutants reveals complex regulation of the
- 747       Arabidopsis methylome. *Cell* **152**: 352–64.
- 748       Sun X, Huang L, Markowitz TE, Blitzblau HG, Chen D, Klein F, Hochwagen A. 2015.
- 749       Transcription dynamically patterns the meiotic chromosome-axis interface. *Elife* **4**.
- 750       Tanaka T, Cosma MP, Wirth K, Nasmyth K. 1999. Identification of cohesin association
- 751       sites at centromeres and along chromosome arms. *Cell* **98**: 847–58.
- 752       Uhlmann F. 2016. SMC complexes: from DNA to chromosomes. *Nat Rev Mol Cell Biol*
- 753       **17**: 399–412.
- 754       Underwood CJ, Choi K, Lambing C, Zhao X, Serra H, Borges F, Simorowski J, Ernst E,
- 755       Jacob Y, Henderson IR, et al. 2018. Epigenetic activation of meiotic recombination
- 756       near Arabidopsis thaliana centromeres via loss of H3K9me2 and non-CG DNA
- 757       methylation. *Genome Res* doi: 10.1101/gr.227116.117.
- 758       Walker J, Gao H, Zhang J, Aldridge B, Vickers M, Higgins JD, Feng X. 2018. Sexual-
- 759       lineage-specific DNA methylation regulates meiosis in Arabidopsis. *Nat Genet* **50**:
- 760       130–137.
- 761       Watanabe Y, Nurse P. 1999. Cohesin Rec8 is required for reductional chromosome
- 762       segregation at meiosis. *Nature* **400**: 461–4.
- 763       Wright KM, Arnold B, Xue K, ?urinov? M, O?Connell J, Bomblies K. 2015. Selection on
- 764       Meiosis Genes in Diploid and Tetraploid Arabidopsis arenosa. *Mol Biol Evol* **32**:
- 765       944–955.
- 766       Yant L, Hollister JDD, Wright KMM, Arnold BJJ, Higgins JDD, Franklin FCHCH,
- 767       Bomblies K. 2013. Meiotic adaptation to genome duplication in Arabidopsis
- 768       arenosa. *Curr Biol* **23**: 2151–6.
- 769       Yelagandula R, Stroud H, Holec S, Zhou K, Feng S, Zhong X, Muthurajan UM, Nie X,
- 770       Kawashima T, Groth M, et al. 2014. The histone variant H2A.W defines
- 771       heterochromatin and promotes chromatin condensation in Arabidopsis. *Cell* **158**:
- 772       98–109.
- 773       Yelina NE, Lambing C, Hardcastle TJ, Zhao X, Santos B, Henderson IR. 2015. DNA
- 774       methylation epigenetically silences crossover hot spots and controls chromosomal
- 775       domains of meiotic recombination in Arabidopsis. *Genes Dev* **29**: 2183–202.
- 776       Zamudio N, Barau J, Teissandier A, Walter M, Borsos M, Servant N, Bourc’his D. 2015.
- 777       DNA methylation restrains transposons from adopting a chromatin signature
- 778       permissive for meiotic recombination. *Genes Dev* **29**: 1256–70.
- 779       Zickler D, Kleckner N. 1999. Meiotic chromosomes: integrating structure and function.
- 780       *Annu Rev Genet* **33**: 603–754.
- 781
- 782
- 783
- 784
- 785
- 786
- 787
- 788
- 789
- 790
- 791
- 792
- 793

794 **Figure Legends:**

795

796 **Figure 1. Complementation of *rec8* meiotic catastrophe via epitope tagging. (A)**  
797 DAPI-stained spreads of wild type (Col), *rec8* and *REC8-HA rec8* male meiocytes at  
798 the labeled stages of meiosis. **(B)** Male meiocytes were stained for REC8-HA (red) and  
799 DAPI (blue), in the labeled genotypes and stages. **(C)** SIM images of wild type and  
800 *rec8* male meiocytes at early prophase I stained for ASY1 (green) and DAPI (blue). **(D)**  
801 As for C, but stained for ASY1 (green), ASY3 (red) and DAPI (blue). Close-ups of *rec8*  
802 axis polycomplexes are shown (lower). White arrows indicate regions staining for ASY1  
803 but not ASY3. **(E)** Male meiocytes at pachytene stained for SMC3 (red) or ZYP1 (red),  
804 DAPI (blue) and *CEN180* FISH (green). Inset images show zooms of the *CEN180*-  
805 positive regions. **(F)** Male meiocytes at metaphase I with FISH performed against *45S*  
806 (green) and *5S* (red) rDNA. The positions of chromosomes 2, 4 and 5 are indicated. All  
807 scale bars=10  $\mu$ m.

808

809 **Figure 2. Genomic landscapes of REC8-cohesin, euchromatin and**  
810 **heterochromatin. (A)** Genome-wide profiles ( $\log_2(\text{ChIP}/\text{input})$ ) of REC8-HA (red)  
811 compared with transposable element density, DNA methylation (%) (Stroud et al. 2013),  
812 H2A.W (Yelagandula et al. 2014), H3K9me2, H3K27me1 and nucleosomes (blue)  
813 (Choi et al. 2018). Vertical solid lines indicate telomeres and dotted lines indicate  
814 centromeres. Spearman's correlation coefficients ( $r_s$ ) are printed above the plots. **(B)**  
815 As for A, but plotting gene density, H3K4me1, H3K4me2, H3K4me3 (Choi et al. 2018),  
816 H2A.Z (Yelagandula et al. 2014) and H3K27me3 (blue). **(C)** ChIP-qPCR enrichment (%  
817 input) in *REC8-HA rec8* and untagged wild type (Col) floral buds at REC8 peaks. **(D)**  
818 REC8-HA ChIP-seq data (black) plotted against Hi-C Eigenvalues (red) that  
819 correspond to the first principle component of the contact matrix, where the sign of the  
820 value denotes compartment (Liu et al. 2016).

821

822 **Figure 3. REC8 enrichment correlates with suppression of meiotic DSBs and**  
823 **crossovers. (A)** Genome-wide profiles ( $\log_2(\text{ChIP}/\text{input})$ ) of REC8-HA (red) compared  
824 with SPO11-1-oligos (Choi et al. 2018), SPO11-1 ChIP and crossovers (blue) (Choi et  
825 al. 2018). Vertical solid lines indicate telomeres and dotted lines indicate centromeres.  
826 Spearman's correlation coefficients ( $r_s$ ) are printed above. **(B)** REC8-HA (red), SPO11-  
827 1-oligos, SPO11-1 ChIP-seq, RNA-seq and nucleosomes (blue) plotted between gene  
828 transcriptional start and termination sites (TSS–TTS) and 2 kb flanking regions,  
829 compared to the same number of random regions of the same widths. **(C)** Average  
830 coverage profiles of REC8-HA (red) compared with SPO11-1-oligos, SPO11-1 ChIP  
831 and nucleosomes (blue) within REC8-HA peaks, compared to the same number of  
832 random positions of the same widths. **(D)** As for C, but plotting over crossover intervals  
833 and 5 kb flanking regions, compared to the same number of random positions. Mean  
834 resolved crossover widths are shown by dotted lines. **(E)** Base frequencies (A+T=blue;  
835 G+C=red) plotted in 2 kb regions around the midpoints of REC8 peaks or nucleosomes  
836 and compared to random positions. **(F)** As for E, but analyzing SPO11-1-oligo hotspots  
837 with 2 kb of flanking sequence, or crossovers with 5 kb.

838

839 **Figure 4. REC8, chromatin and meiotic DSB landscapes are remodeled in *kyp***  
840 ***svuh5 svuh6*. (A)** DAPI-stained or HA immunostained (red) spreads of wild type and  
841 *kss* male meiocytes at the labeled stages. White arrows indicate chromocenters. All  
842 scale bars=10 $\mu$ m. **(B)** REC8-HA ( $\log_2(\text{ChIP}/\text{input})$ ), SPO11-1-oligos, CHG methylation  
843 and H3K9me2 from wild type (blue) and *kss* (red) within hypo-CHG DMRs (Stroud et al.  
844 2013), and 2 kb flanking regions, or the same number of random positions of the same  
845 widths. The lower plot shows nucleosomes and SPO11-1 ChIP-seq in wild type within  
846 the hypo-CHG DMRs. **(C)** As for B, but plotting in relation to H3K9me2 peaks identified



847 in wild type. **(D)** Fold change of REC8 ChIP-qPCR enrichment at REC8 peaks in  
848 *REC8-HA rec8* compared to *kss*, normalized by Peak 3 which has low H3K9me2 and  
849 did not change in *kss*. Peak 7 is a negative control region not expected to change in  
850 *kss*. **(E)** As for B, but plotting in relation to DNA transposons. **(F)** As for B, but plotting  
851 in relation to RNA transposons. **(G)** Bar graphs showing permutation test derived  
852  $\log_2(\text{observed}:\text{expected})$  overlap of REC8 and SPO11-1-oligo peaks in wild type and  
853 *kss* with different transposon families. Vertical gray lines mark significance thresholds  
854 ( $\alpha=0.05$ ).  
855

856 **Figure 5. REC8 is shaped by chromatin state and transcription within genes and**  
857 **transposons. (A)** REC8-HA ( $\log_2(\text{ChIP}/\text{input})$  red) compared with RNA-seq from  
858 meiocytes and floral buds (blue) (Walker et al. 2018; Choi et al. 2018). Vertical solid  
859 lines indicate telomeres and dotted lines indicate centromeres. Spearman's correlation  
860 coefficients ( $r_s$ ) are printed above the plots. **(B)** REC8-HA (red) was compared with  
861 RNA-seq (Choi et al. 2018), H3K4me1, H3K4me2, H3K4me3, H2A.Z and DNA  
862 methylation in CG, CHG and CHH sequence contexts (blue) (Stroud et al. 2013) in  
863 gene TSS–TTS and 2 kb flanking regions, or the same number of random regions of  
864 the same widths. Spearman's correlation coefficients ( $r_s$ ) are printed above. **(C)** As for  
865 B, but analyzing the indicated parameters within genes that were ranked into hexiles  
866 according to REC8 levels between TSS and TTS (red=highest, blue=lowest). **(D)** As for  
867 B, but analyzing REC8-HA, SPO11-1-oligos or CHG DNA methylation between gene  
868 TSS and TTS, or the same number of random positions of the same widths, in wild  
869 type (blue) versus *kss* (red). **(E)** As for D, but analyzing genes that are transcriptionally  
870 upregulated in *kss* and plotting REC8-HA, SPO11-1-oligos and CHG DNA methylation.  
871 **(F)** As for E, but analyzing transposable elements (TEs) that are transcriptionally  
872 upregulated in *kss*.  
873

874 **Figure 6. Axis polycomplexes recruit the homologous recombination machinery**  
875 **with altered stoichiometry in *rec8*.** **(A)** Wild type and *rec8* male meiocytes in mid-  
876 prophase I were stained for ASY1 (green),  $\gamma$ H2A.X (red) and DAPI (blue). In parts A–D,  
877 wild type nuclei are at leptotene. **(B)** As for A, but staining for RAD51 (red) and ASY1  
878 (green). **(C)** As for A, but staining for DMC1 (red) and ASY1 (green). **(D)** As for A, but  
879 staining for MSH4 (red) and ASY1 (green). **(E)** As for A, but at diakinesis stage and  
880 stained for MLH1 (red) and DAPI (blue). **(F)** SIM images of male meiocytes at zygotene  
881 stage stained for ASY1 (red), ZYP1 (green) and DAPI (blue). Close-ups of synapsed  
882 regions are shown in the lower panels, for each genotype. **(G)** As for F, but showing  
883 close-ups of ASY1 (red) and ZYP1 (green) staining. Scale bars=200 nm. **(H)** As for F,  
884 but staining for PCH2 (red), ZYP1 (green) and DAPI (blue). **(I)** Male meiocytes in mid-  
885 prophase I stained for ASY1 (green), SMC3 (red) and DAPI (blue). All scale bars=10  
886  $\mu\text{m}$ , apart from in (G).  
887

888 **Figure 7. Cohesin and chromatin orchestrate meiotic chromosome architecture**  
889 **and interhomolog recombination. (A)** Linear loop arrays of sister chromatids (black  
890 and blue) are tethered to the meiotic axis at pachytene stage, via passage through  
891 REC8-cohesin rings (red). Associated with cohesin are SPO11-1 (green) and the  
892 synaptonemal complex protein ZYP1 (purple). Chromatin loops extend from the axis  
893 for ~300 nm (Ferdous et al. 2012; Armstrong et al. 2002). A 1  $\mu\text{m}$  section of axis is  
894 shown with 20 loops (Zickler and Kleckner 1999), with the physical length of DNA  
895 associated with 1  $\mu\text{m}$  of axis inferred from FISH experiments (Fransz et al. 2000). **(B)** A  
896 close-up of A is shown, with one loop beneath corresponding to 600 nm and ~15 kb in  
897 euchromatin and ~30 kb in heterochromatin. Chromatin fiber compaction is shown by  
898 the black line with nucleosomes (black circles) represented, along with average  
899 sequence composition of genes (green), DNA transposons (purple) and RNA

900 transposons (blue). The relative positions of DSBs (red stars) in wild type euchromatin  
901 and heterochromatin, and in *kyp suvh5 suvh6* heterochromatin, are indicated.

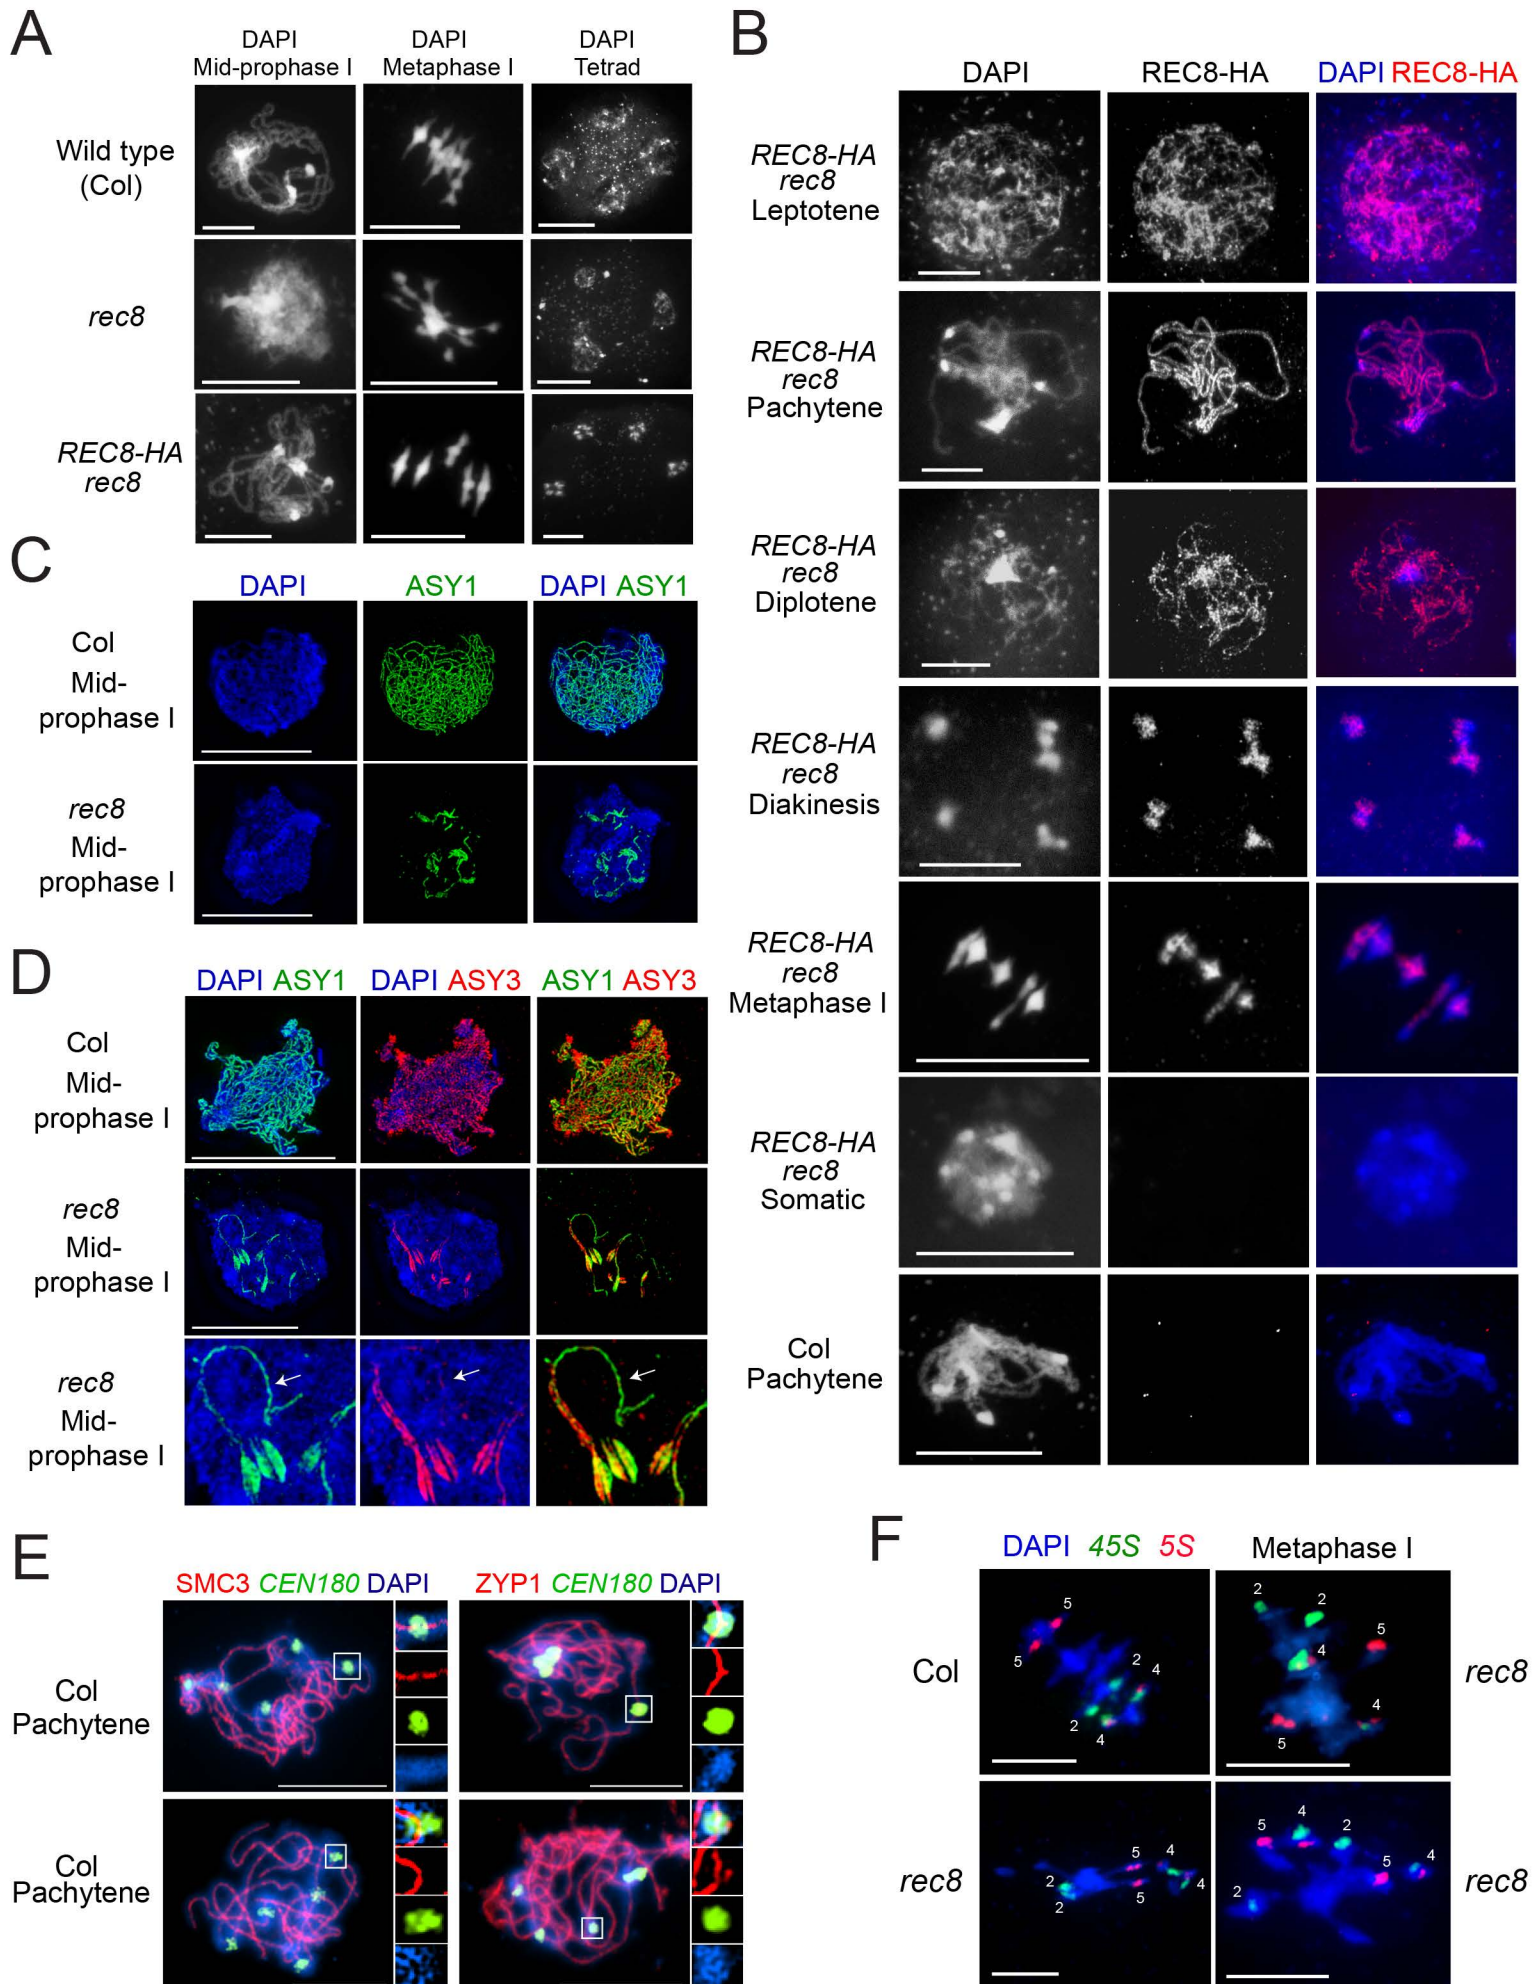

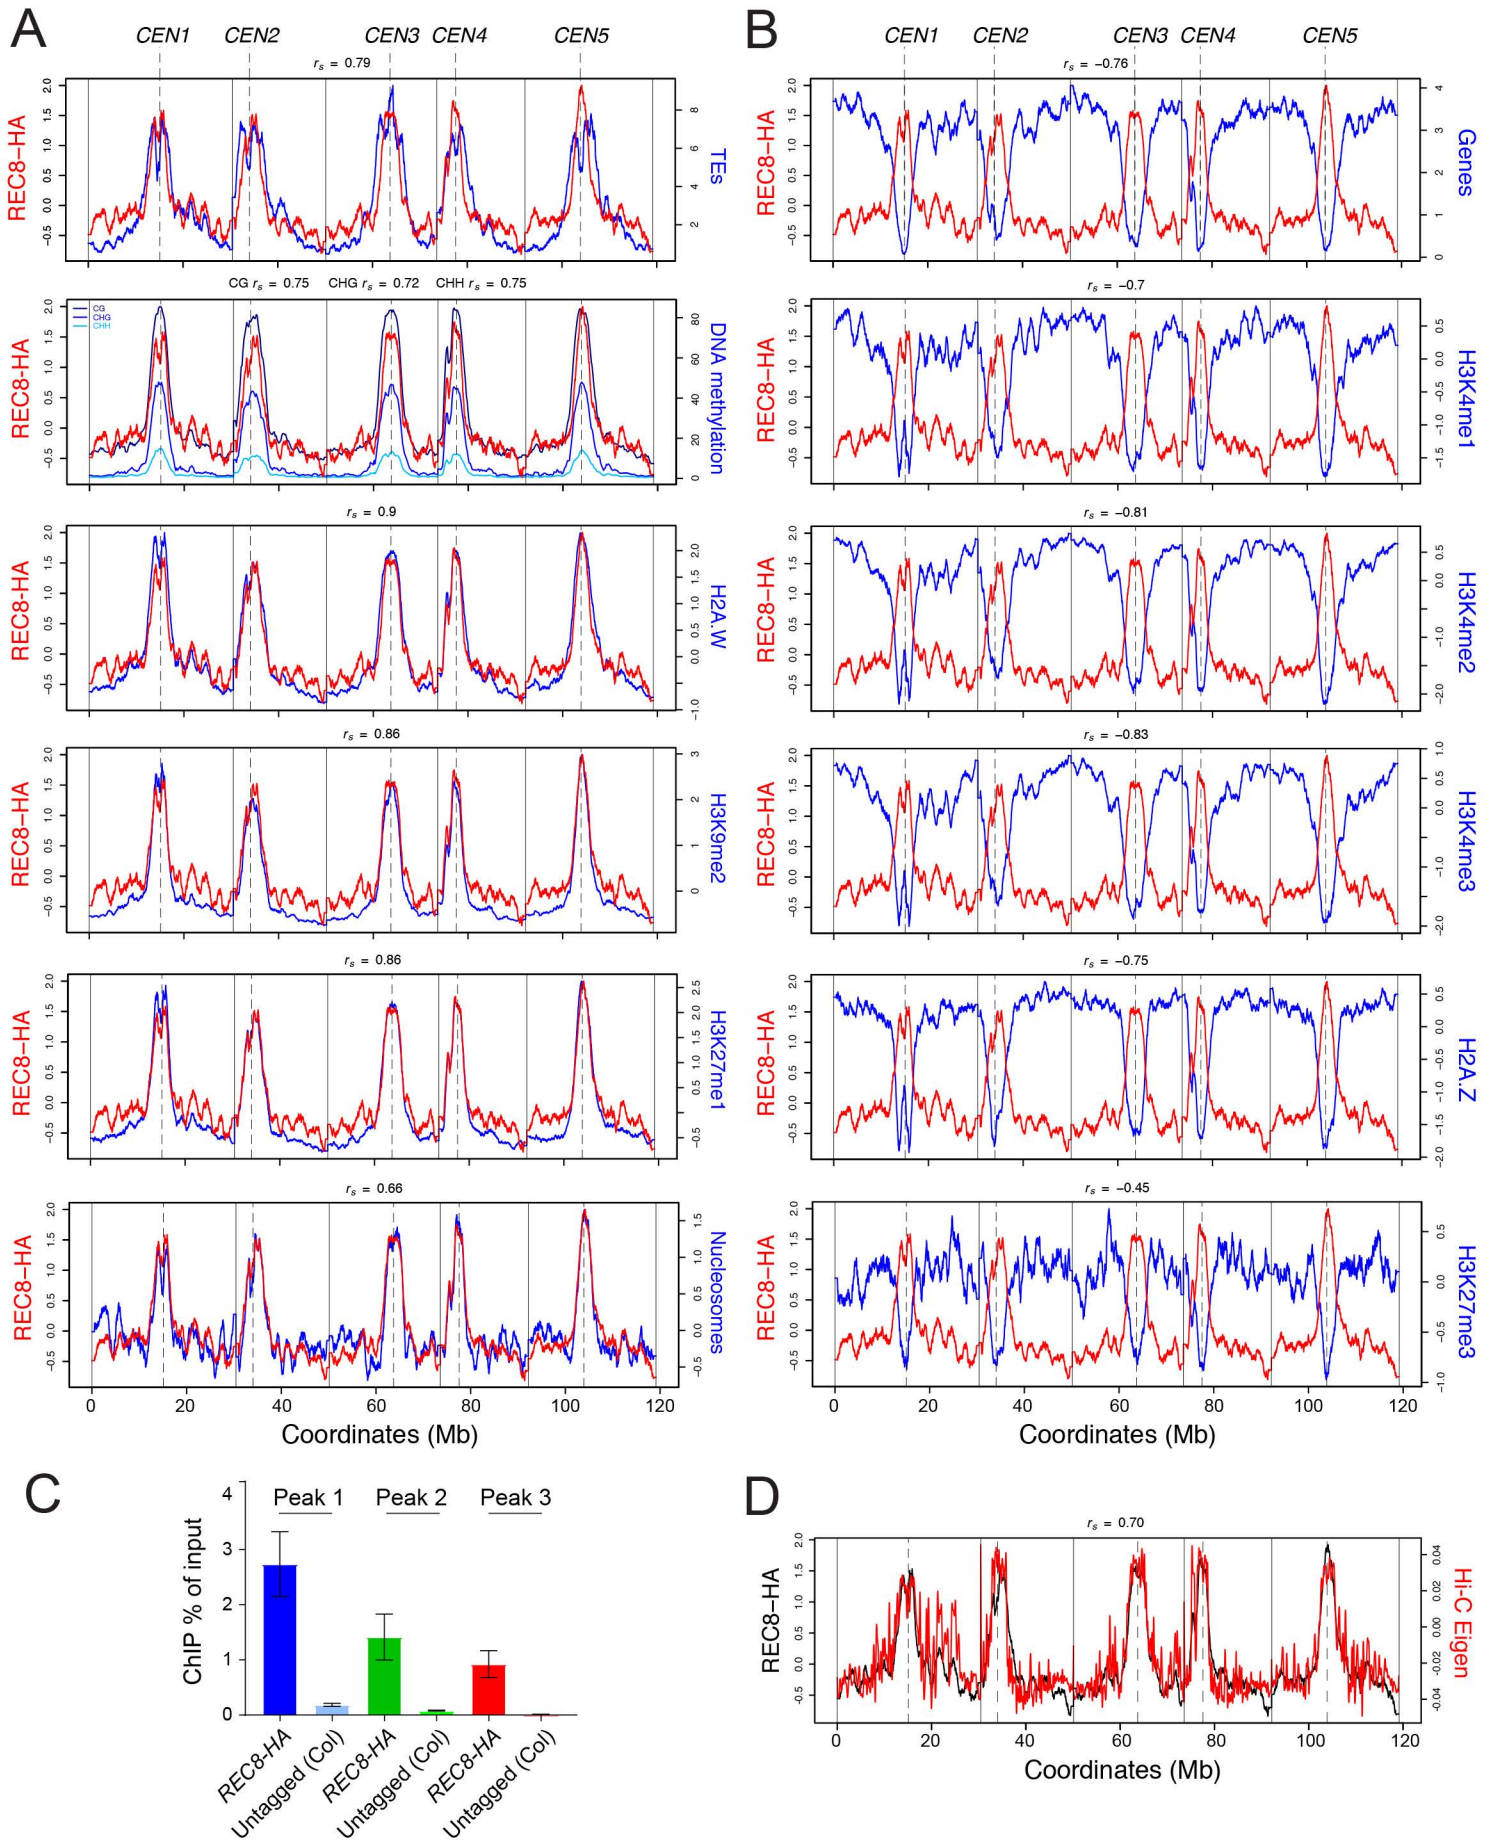

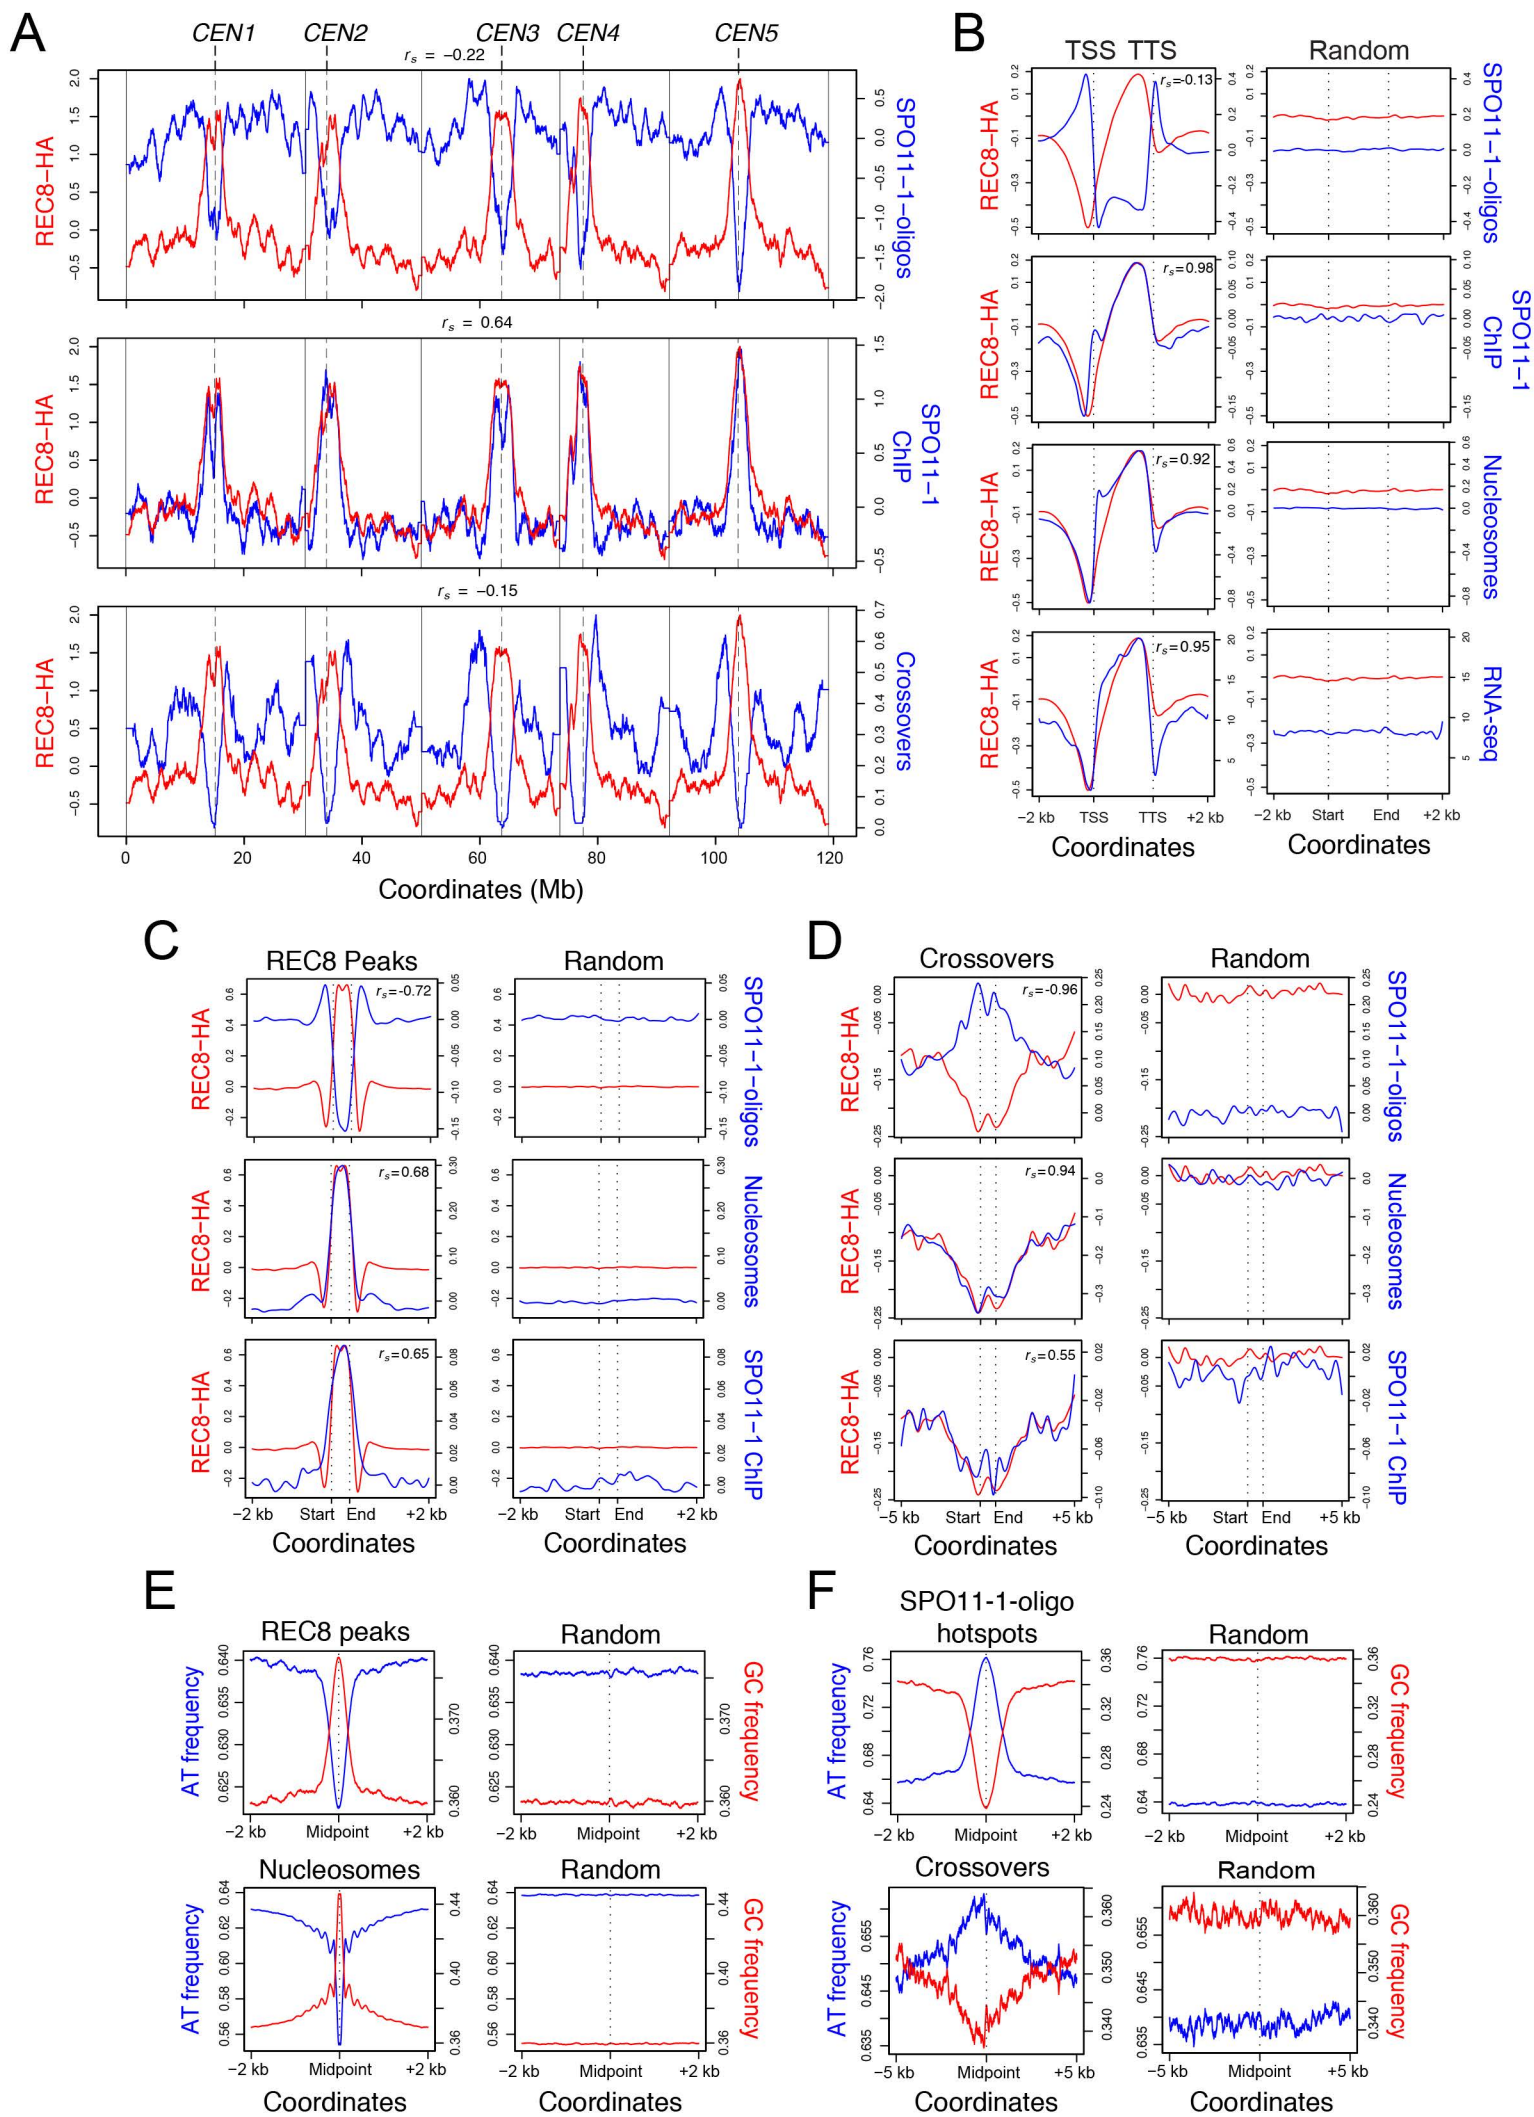

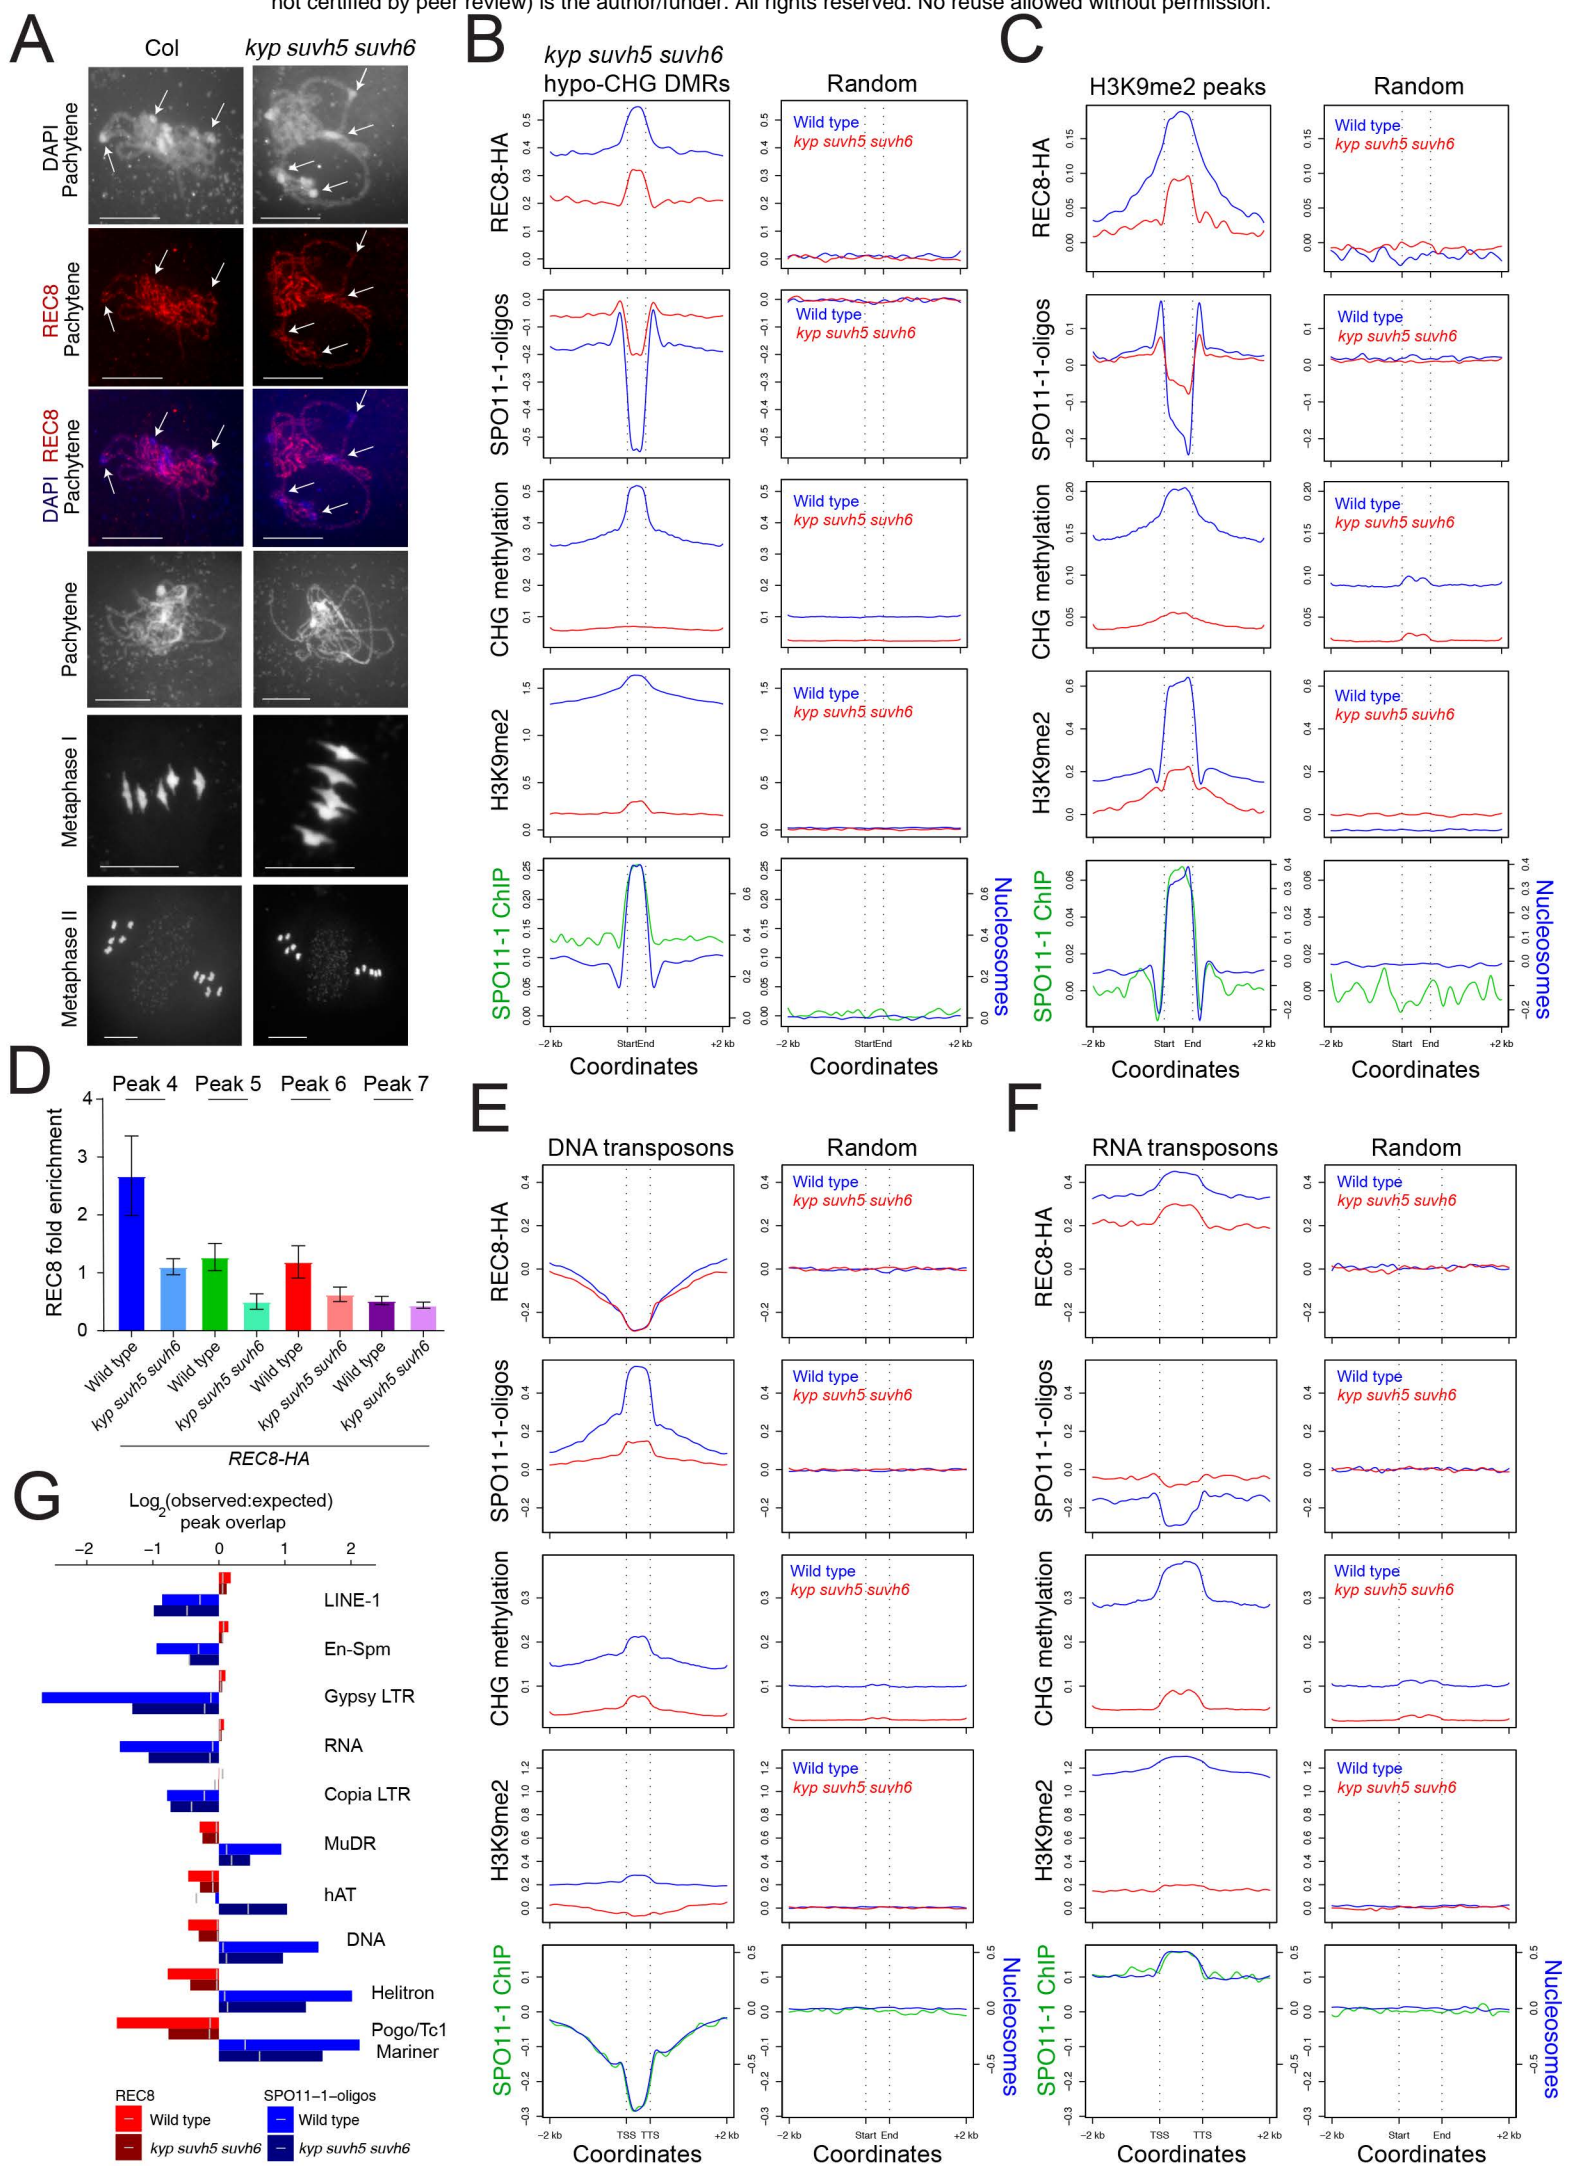

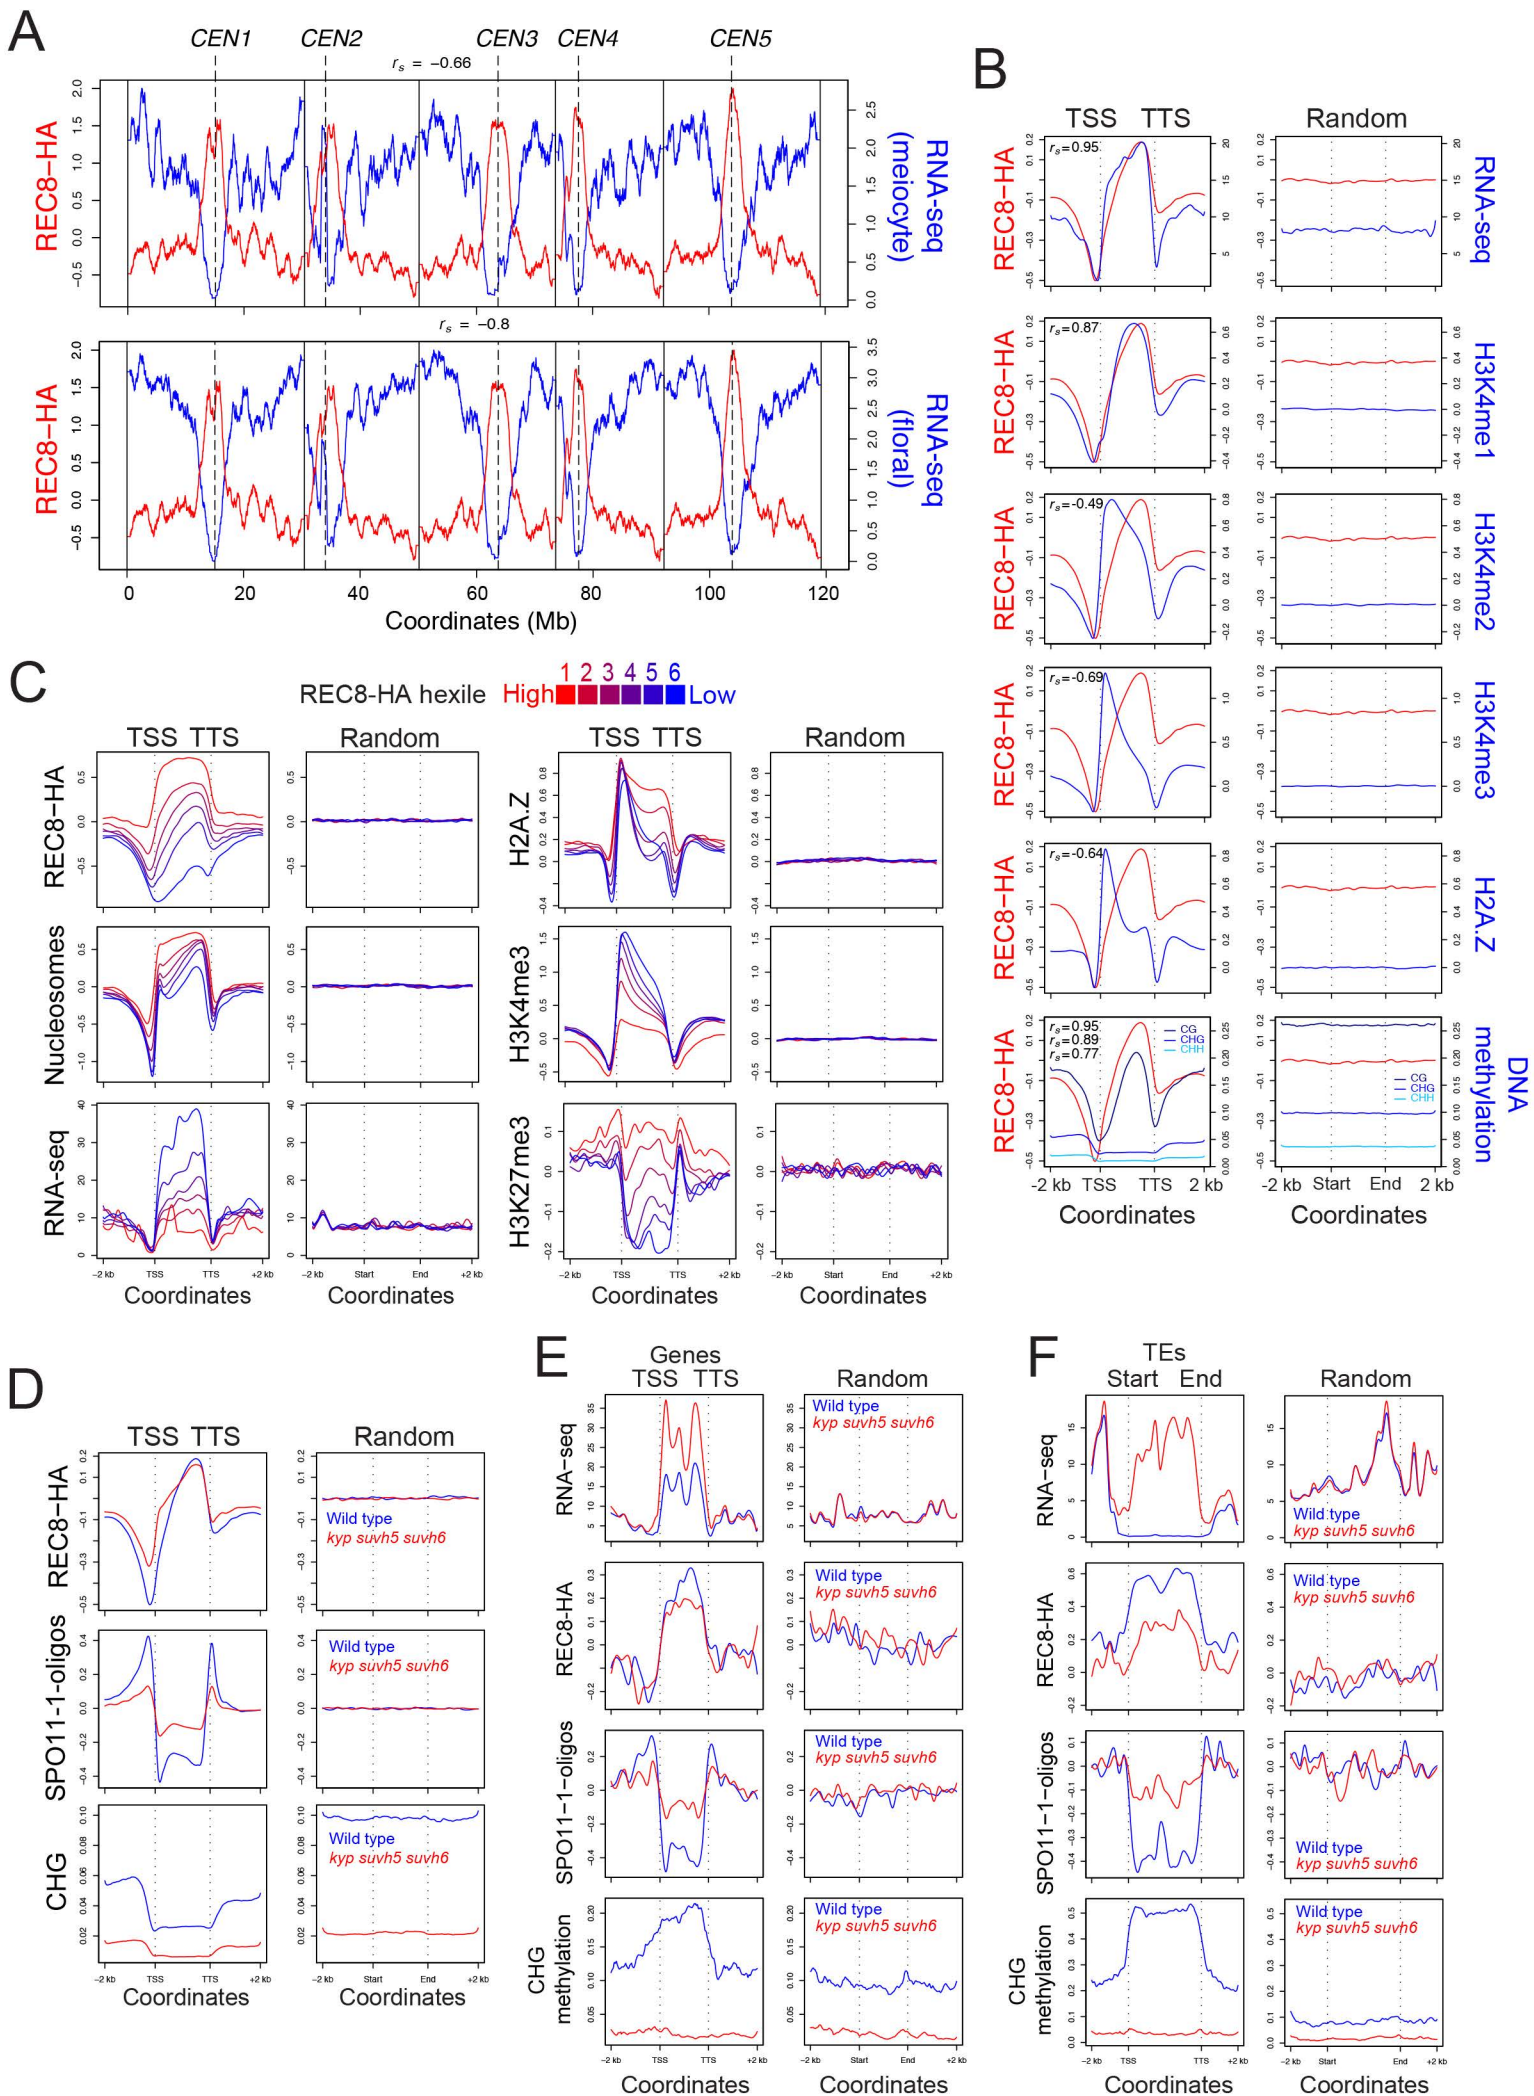

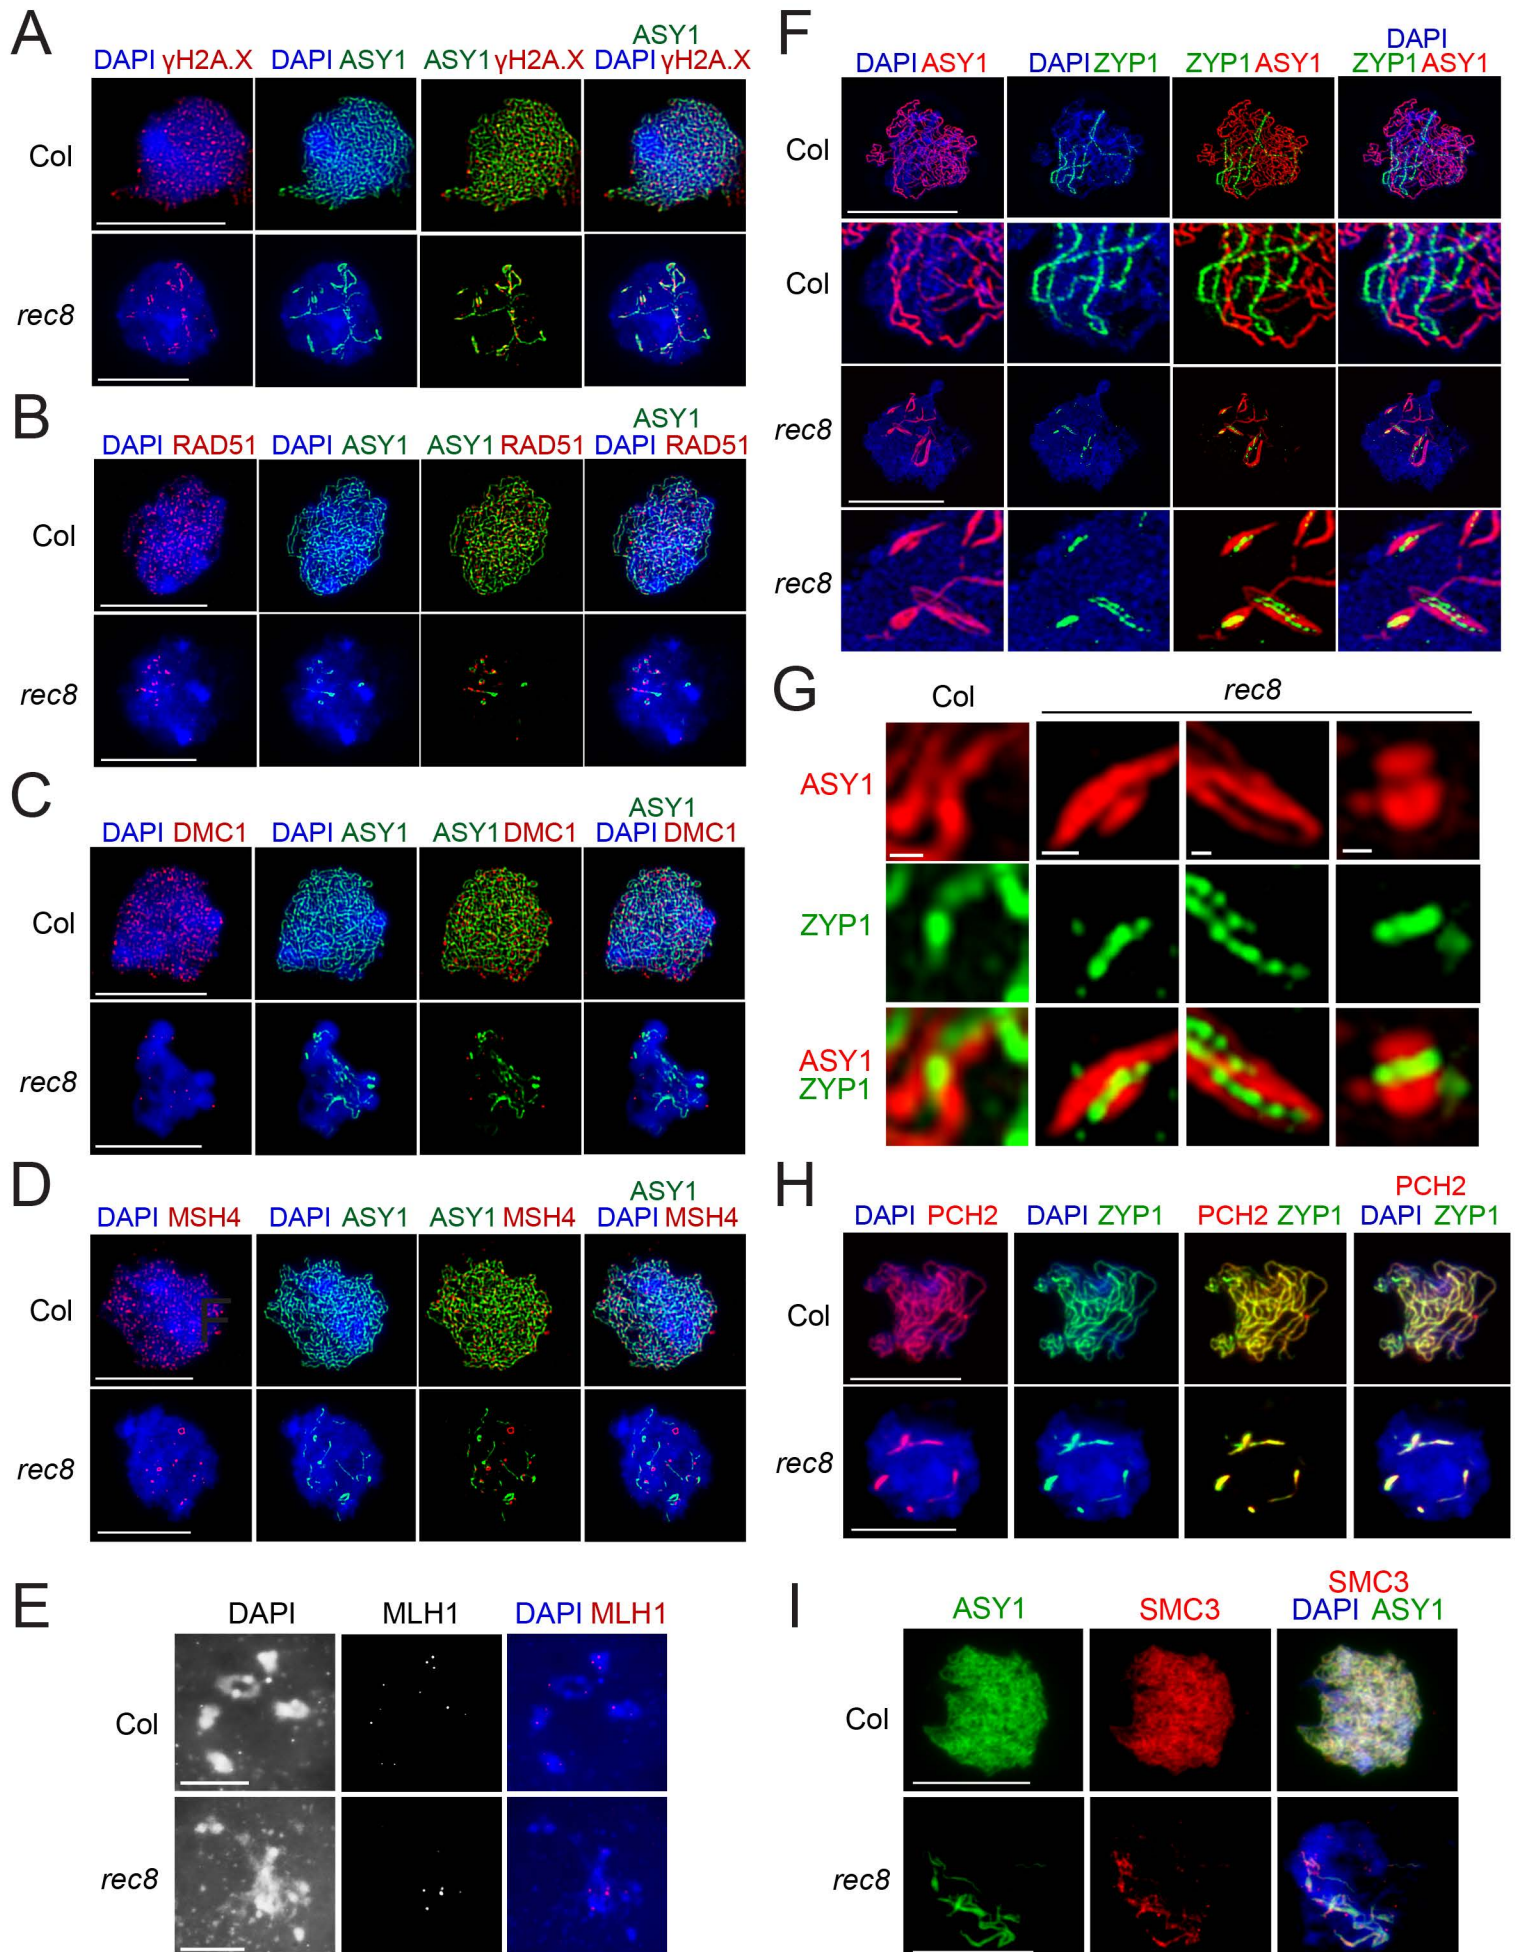



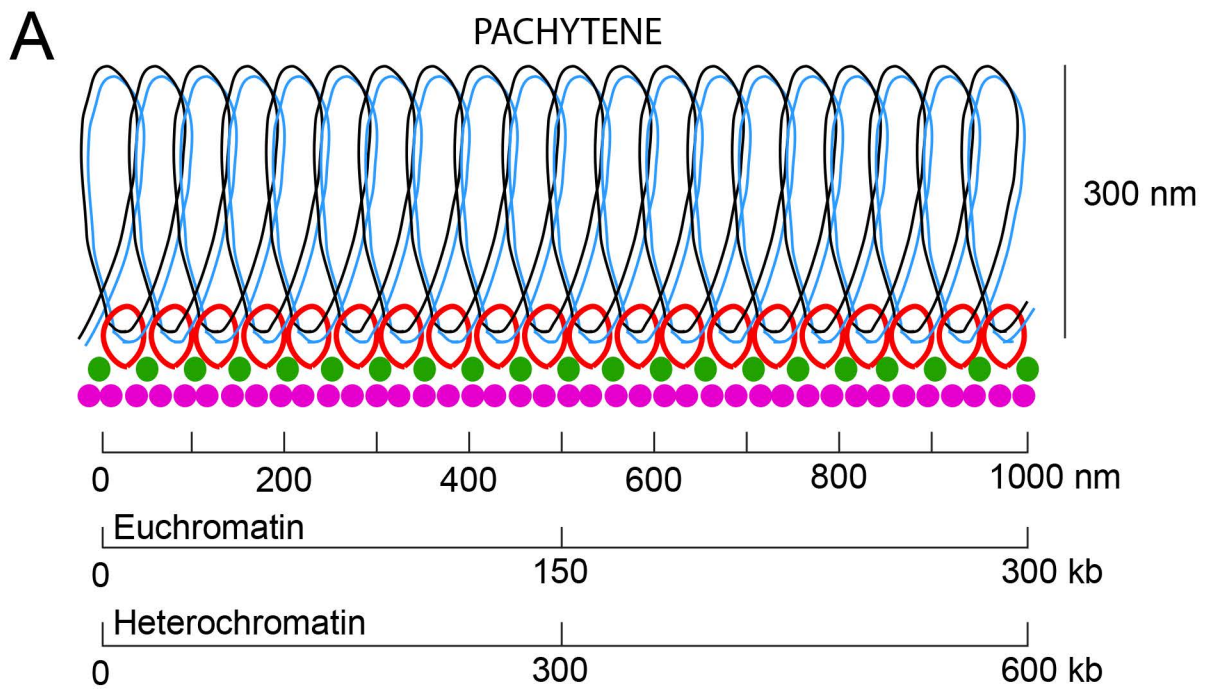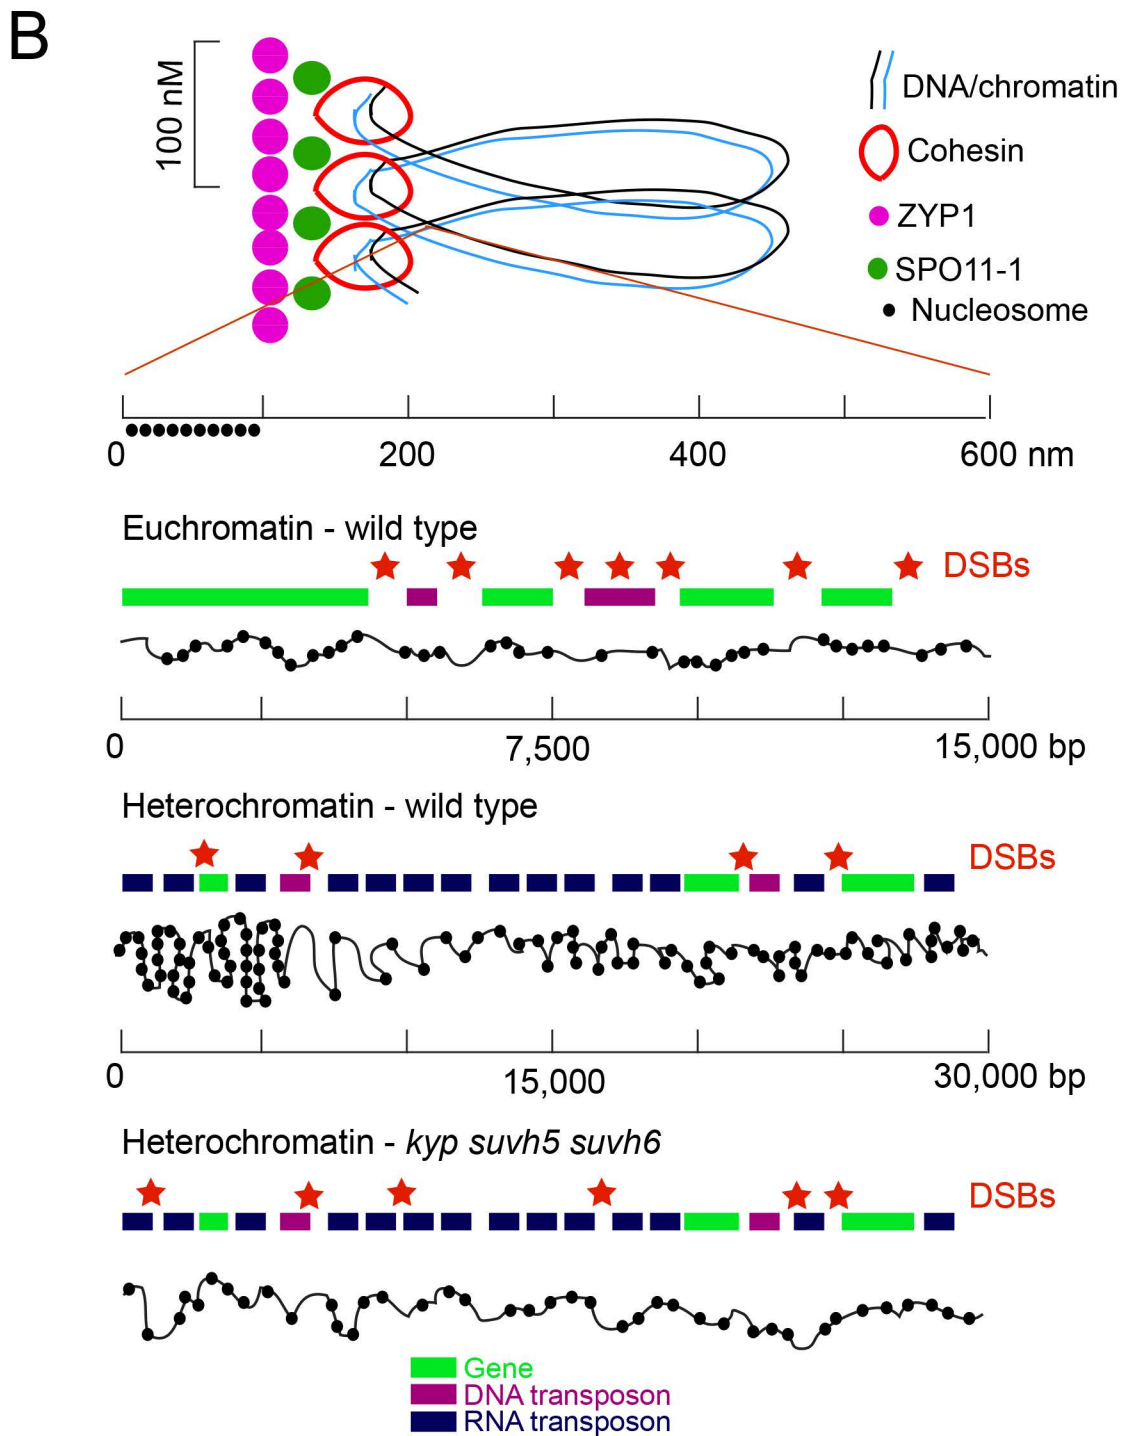

Source: https://www.biorxiv.org/content/10.1101/512400v1.full.pdf
